# Supplementary material for: Turning main-group element magnesium into a highly active electrocatalyst for oxygen reduction reaction
Source: PubMed Central journal article supplement (PMC7028951; doi:10.1038/s41467-020-14565-w), 2020-02-18
Supplement: 41467_2020_14565_MOESM1_ESM.pdf [file 41467_2020_14565_MOESM1_ESM.pdf]

1 **Turning main-group element Mg into a highly active electrocatalyst**  
2 **for oxygen reduction reaction**

3 Liu et al.

4  
5  
6  
7  
8  
9  
10  
11  
12  
13  
14  
15  
16  
17  
18  
19  
20  
21  
22  
23  
24  
25  
26  
27

28 **Turning main-group element Mg into a highly active electrocatalyst**  
29 **for oxygen reduction reaction**

30 Shuai Liu,<sup>1</sup> Zedong Li,<sup>1</sup> Changlai Wang,<sup>1</sup> Weiwei Tao,<sup>3</sup> Minxue Huang,<sup>1</sup> Ming Zuo,<sup>1</sup> Yang Yang,<sup>1</sup>  
31 Kang Yang,<sup>1</sup> Lijuan Zhang,<sup>4</sup> Shi Chen,<sup>1</sup> Pengping Xu,<sup>1</sup> Qianwang Chen<sup>1,2</sup>

32 <sup>1</sup>Hefei National Laboratory for Physical Science at Microscale and Department of Materials  
33 Science & Engineering, University of Science and Technology of China, Hefei 230026, China

34 <sup>2</sup>Anhui Province Key Laboratory of Condensed Matter Physics at Extreme Conditions, High  
35 Magnetic Field Laboratory of Chinese, Academy of Sciences, Hefei 230031, China

36 <sup>3</sup>Department of Mechanical Engineering, Boston University, Boston, MA 02215, USA

37 <sup>4</sup>Shanghai Synchrotron Radiation Facility, Shanghai Institute of Applied Physics, Shanghai  
38 201203, China

39

40 **Contents**

41

42 **1. Supplementary Figures 1-41**

43 **1.1 The calculated details for models (Supplementary Figures 1-11)**

44 **1.2 Characterization of pyrolysis products and ORR performance of the catalysts**  
45 **(Supplementary Figures 12-31)**

46 **1.3 Characterization of post-doped Mg in N-C host and ORR performance of the**  
47 **catalysts (Supplementary Figures 32-36)**

48 **1.4 Reaction pathway details and other spatial configurations similar to MN<sub>2</sub>C**  
49 **(Supplementary Figures 37-41)**

50 **2. Supplementary Tables 1-11**

51 **3. Supplementary References**

52

53

54 **1. Supplementary Figures**

55 **1.1 The calculated details for models**

56

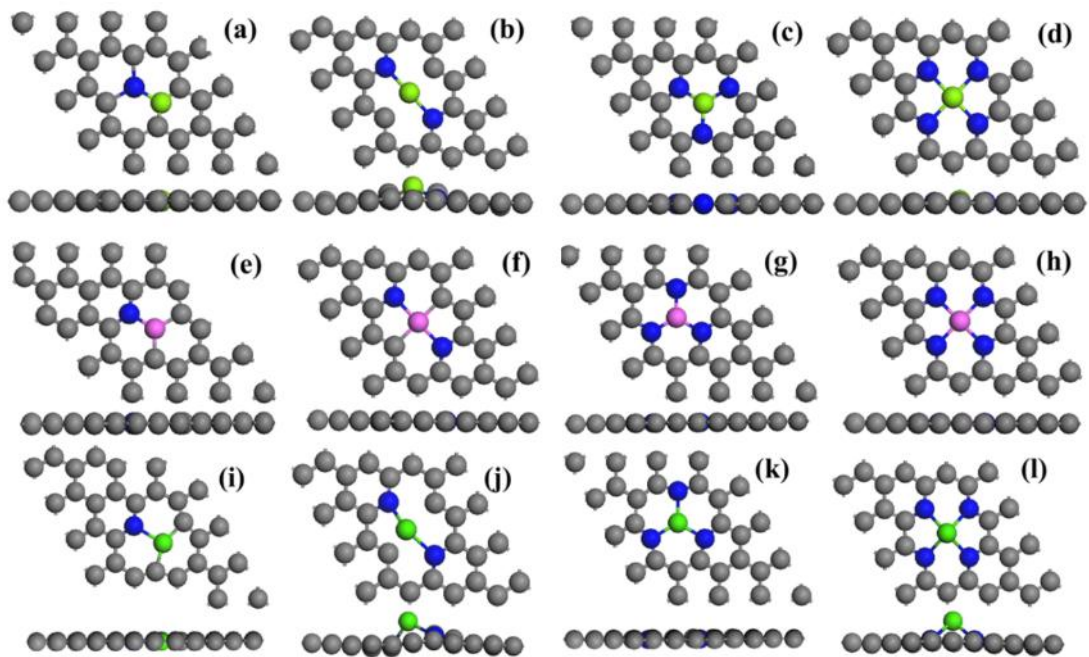

57

58 **Supplementary Figure 1.** Atomistic structure of the calculated models. (a-d) The  
 59 MN<sub>x</sub>C model with one, two, three, four N atoms respectively from both the top view  
 60 and side view. (e-f) The AN<sub>x</sub>C model with one, two, three, four N atoms respectively  
 61 from both the top view and side view. (i-l) The CN<sub>x</sub>C model with one, two, three, four  
 62 N atoms respectively from both the top view and side view. For all images, green, blue  
 63 and gray balls represent metal, N and C atoms, respectively.

64

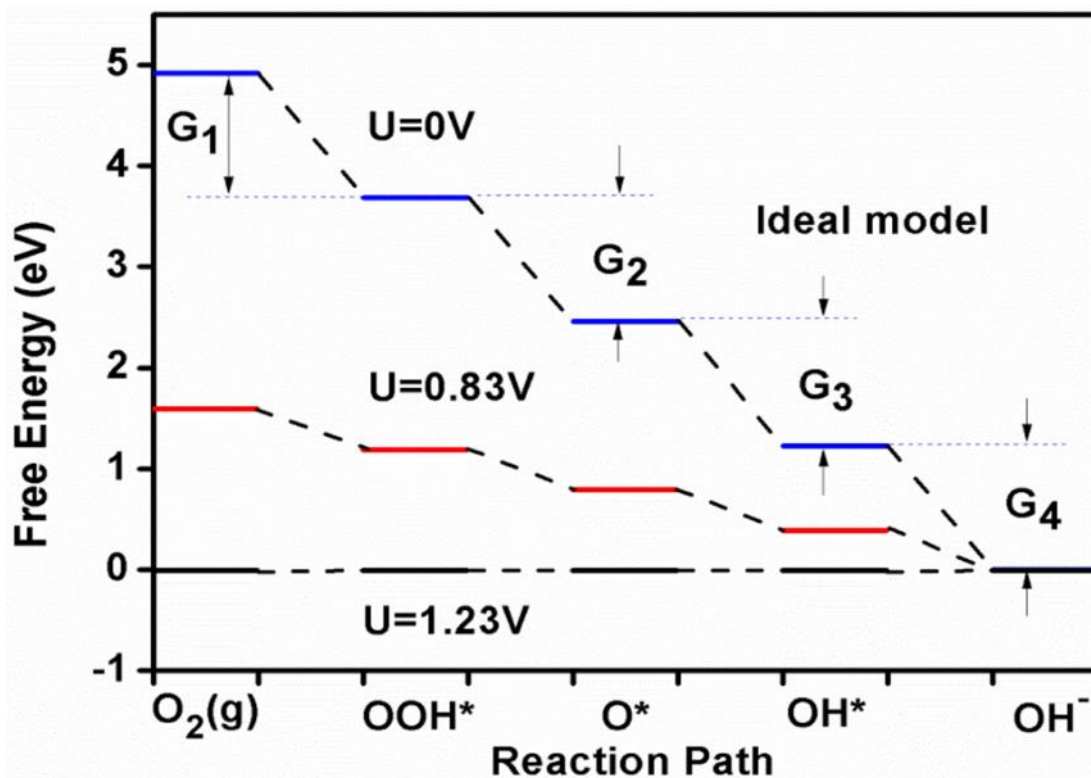

65

66 **Supplementary Figure 2.** Free-energy evolution diagram for ORR of the ideal model  
 67 through a 4e<sup>-</sup> associative pathway under electrode potential of U=0, U=0.83V and  
 68 U=1.23V.

69

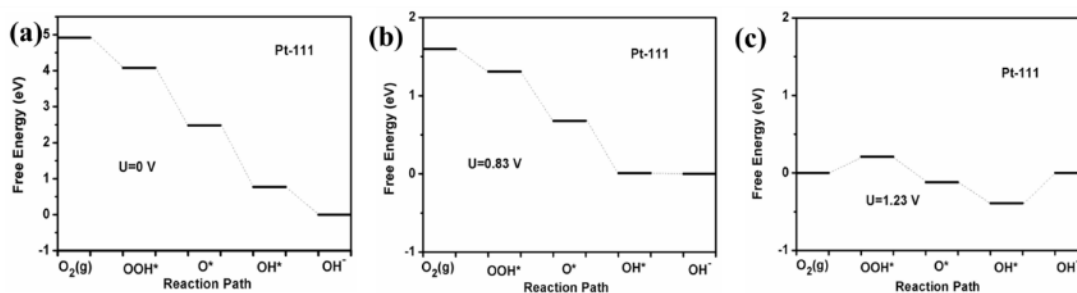

70

71 **Supplementary Figure 3.** Free-energy evolution diagram for ORR of Pt(111) model.  
 72 It is shown with a 4e<sup>-</sup> associative pathway under output potential of (a) U=0, (b)  
 73 U=0.8V and (c) U=1.23V.

74

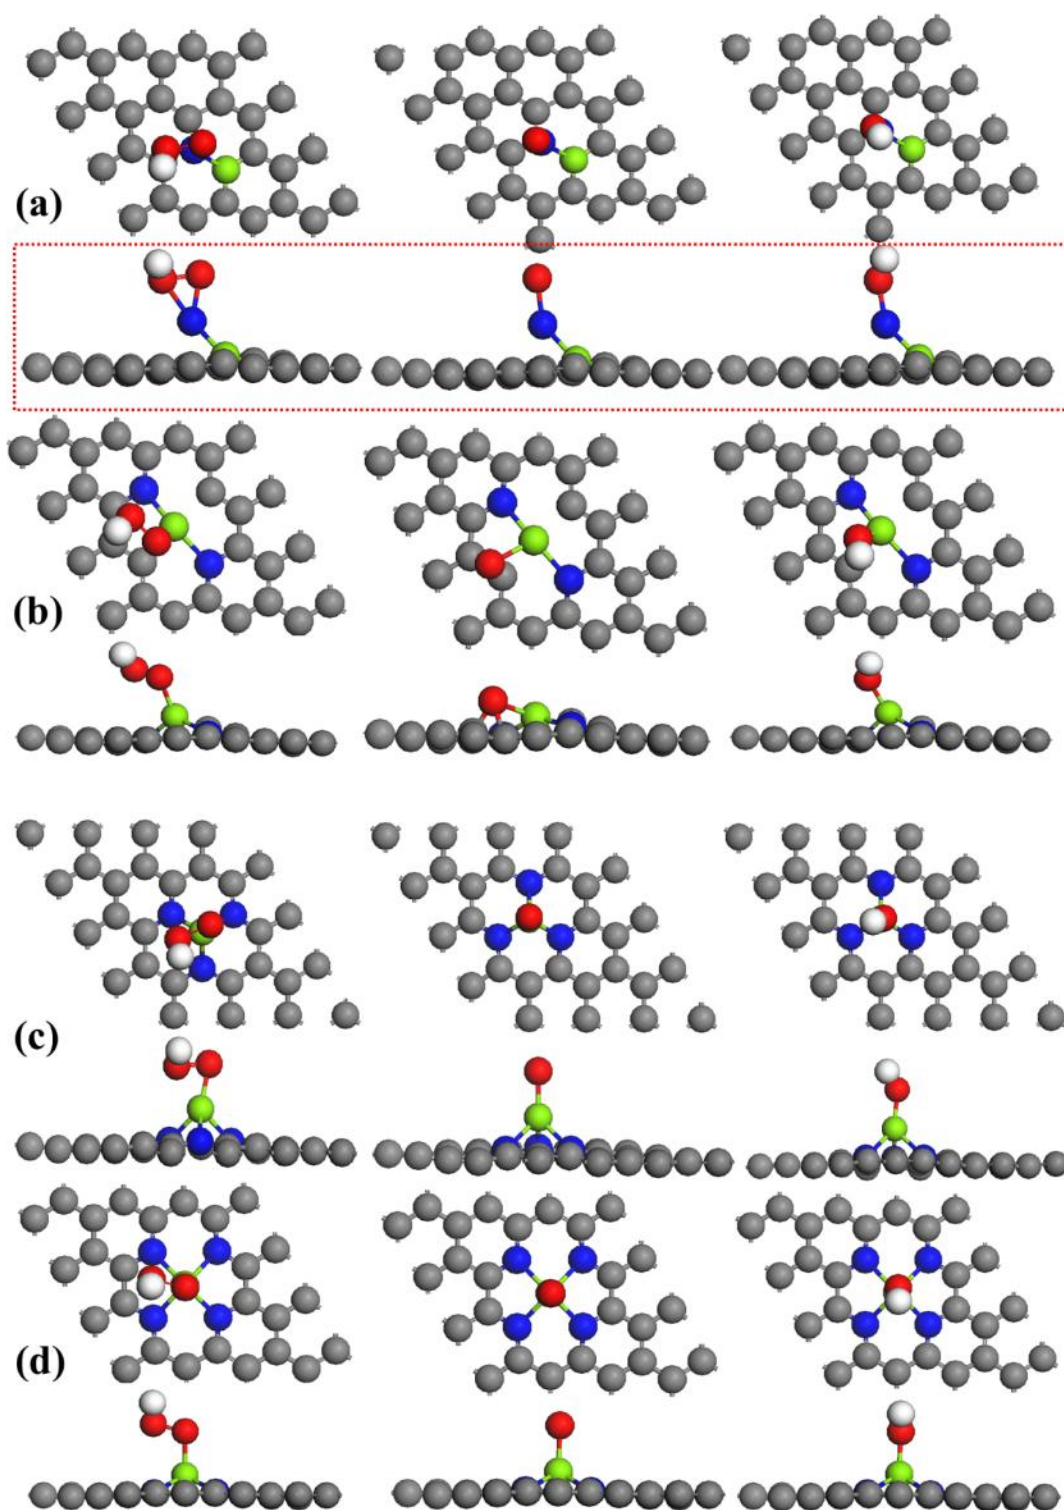

75

76 **Supplementary Figure 4.** Atomistic structure of the intermediates. Transition OOH\*  
 77 state (left panel), O\* state (middle panel) and OH\* state (right panel) for ORR reaction  
 78 on (a) MN1C, (b) MN2C, (c) MN3C and (d) MN4C. Green, blue, red, white and gray  
 79 balls represent Mg, N, O, H and C atoms, respectively. As shown in Figure a, the MN1C

80 is unstable for ORR process as the metal center get out of plane after interaction with  
81 intermediates.

82

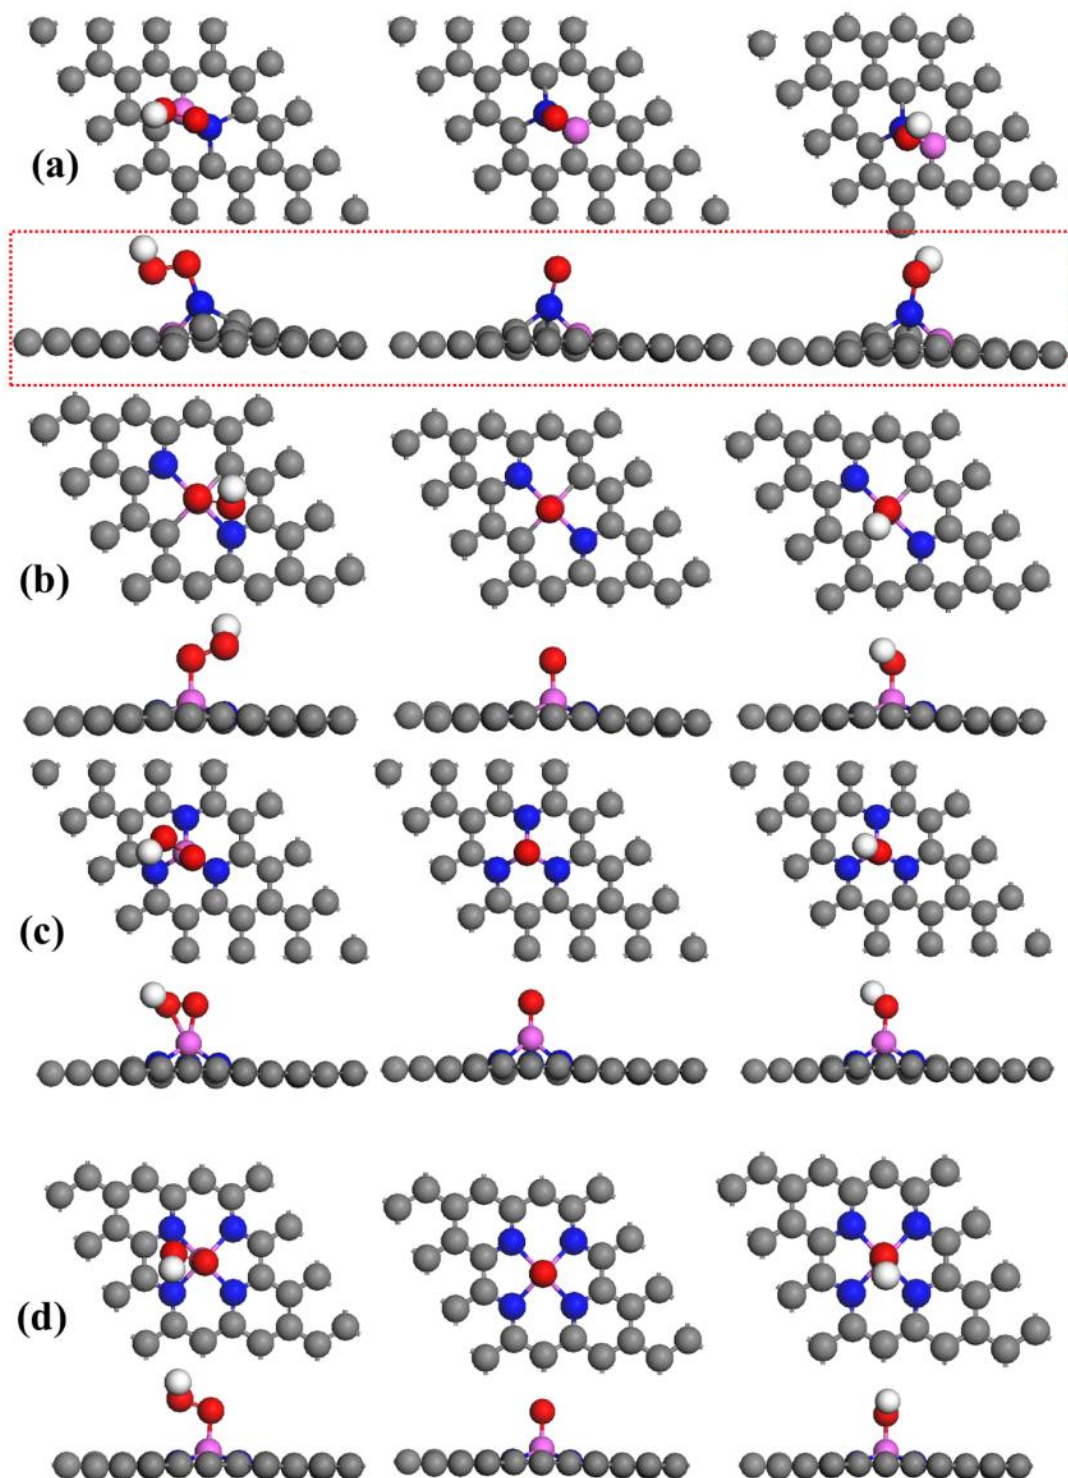

83

84 **Supplementary Figure 5.** Atomistic structure of the intermediates. Transition OOH\*  
85 state (left panel), O\* state (middle panel) and OH\* state (right panel) for ORR reaction

86 on (a) AN1C, (b) AN2C, (c) AN3C and (d) AN4C. Green, blue, red, white and gray  
87 balls represent Al, N, O, H and C atoms, respectively. As shown in Figure a, the AN1C  
88 is unstable for ORR process as the metal center get out of plane after interaction with  
89 intermediates.

90

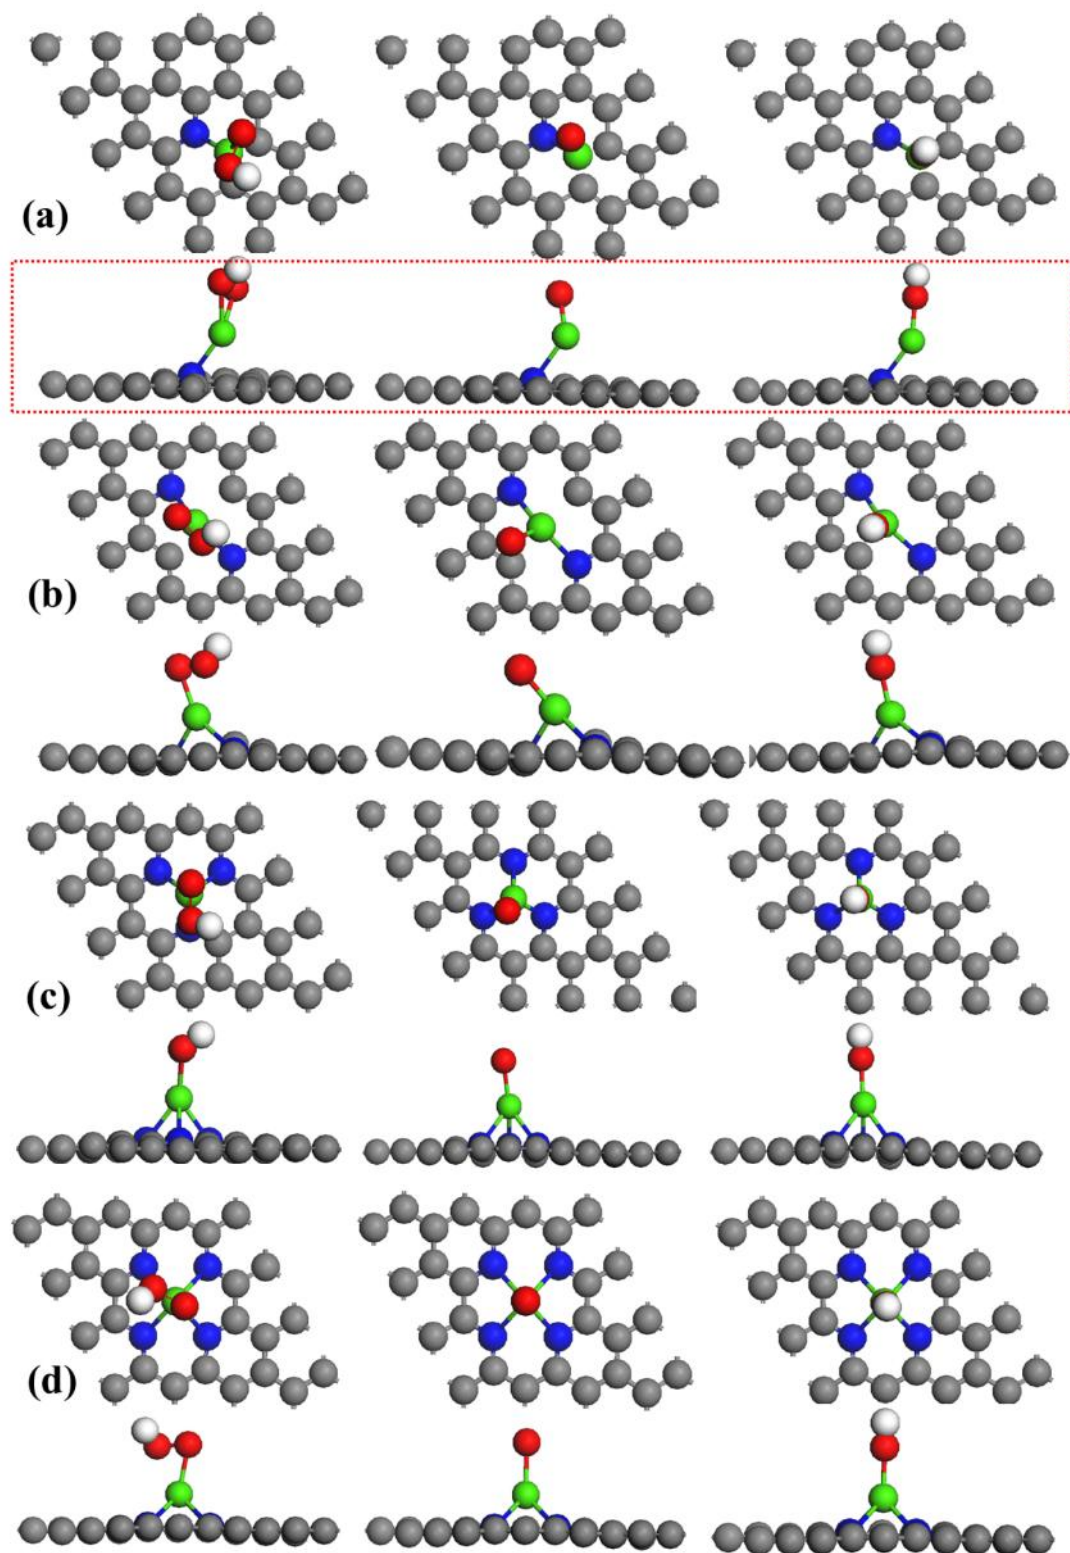

91

92 **Supplementary Figure 6.** Atomistic structure of the intermediates. Transition OOH\*  
 93 state (left panel), O\* state (middle panel) and OH\* state (right panel) for ORR reaction  
 94 on (a) CN1C, (b) CN2C, (c) CN3C and (d) CN4C. Green, blue, red, white and gray  
 95 balls represent Ca, N, O, H and C atoms, respectively. As shown in Figure a, the CN1C



96 is unstable for ORR process as the metal center get out of plane after interaction with  
97 intermediates.

98

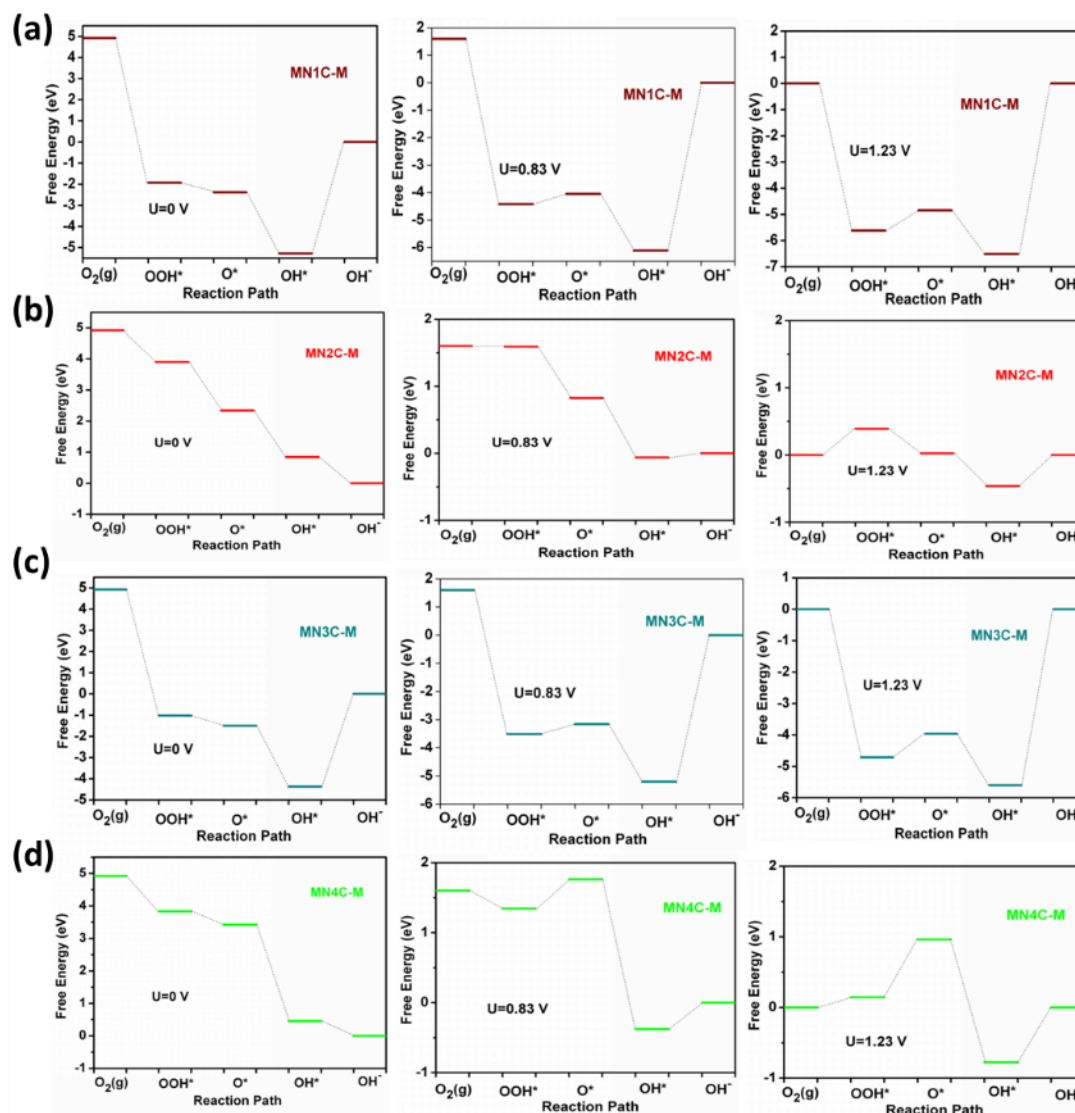

99

100 **Supplementary Figure 7.** Free-energy evolution diagram for ORR. The diagrams for  
101 (a) MN1C, (b) MN2C, (c) MN3C and (d) MN4C model through a 4e<sup>-</sup> associative  
102 pathway under electrode potential of U=0, U=0.83V and U=1.23V. And the MN<sub>x</sub>C-M  
103 represents the initial active sites are set at metal center (Mg) which is distinguished  
104 from other initial sites calculated in section 1.4 in SI.

105 For Mg sites in ORR, they show downhill trend in oxygen activation step (O<sub>2</sub>  
106 transforms to OOH) which reveals Mg sites accelerate the ORR in initial step. However,  
107 they show uphill energy barriers from OH release step which hampers the whole  
108 process. The MN2C-M with reasonable surface electronic structure shows the smallest

109 uphill energy barrier of OH release step which has the best activity among MN<sub>x</sub>C  
 110 models (Table S4), and MN1C shows the extremely large energy barrier which is  
 111 caused by unstable structure as shown in Supplementary Figure 4.

112

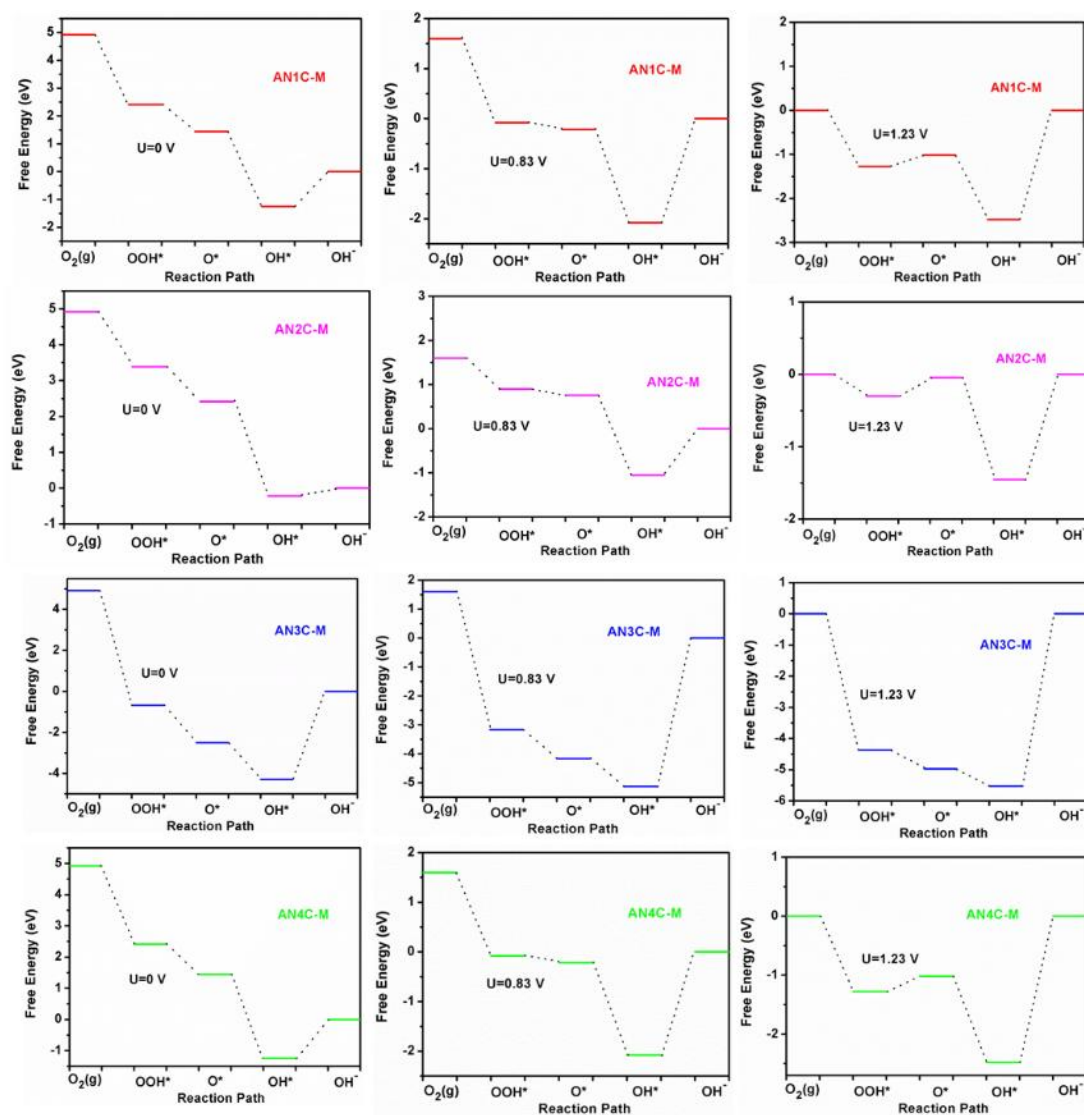

113

114 **Supplementary Figure 8.** Free-energy evolution diagram for ORR of (a) AN1C, (b)  
 115 AN2C, (c) AN3C and (d) AN4C model through a 4e- associative pathway under  
 116 electrode potential of U=0, U=0.83V and U=1.23V. The active site is set as the metal  
 117 center.

118 For Al sites in ORR, they show downhill trend in oxygen activation step (O<sub>2</sub>  
 119 transforms to OOH) which reveals Al sites accelerate the ORR in initial step. However,  
 120 they show larger uphill energy barriers from OH release step than Mg sites which  
 121 hampers the whole process and lower activity than Mg cofactors.

122 The Al center is hampered by strong binding of hydroxyl for the large energy  
 123 barrier of dis-adsorption of OH\* in last step. The AN2C-M shows the smallest uphill  
 124 energy barrier which has the best activity among ANx C models (Table S4), and AN1C  
 125 shows the extremely large energy barrier which is caused by unstable structure as  
 126 shown in Fig. S5.

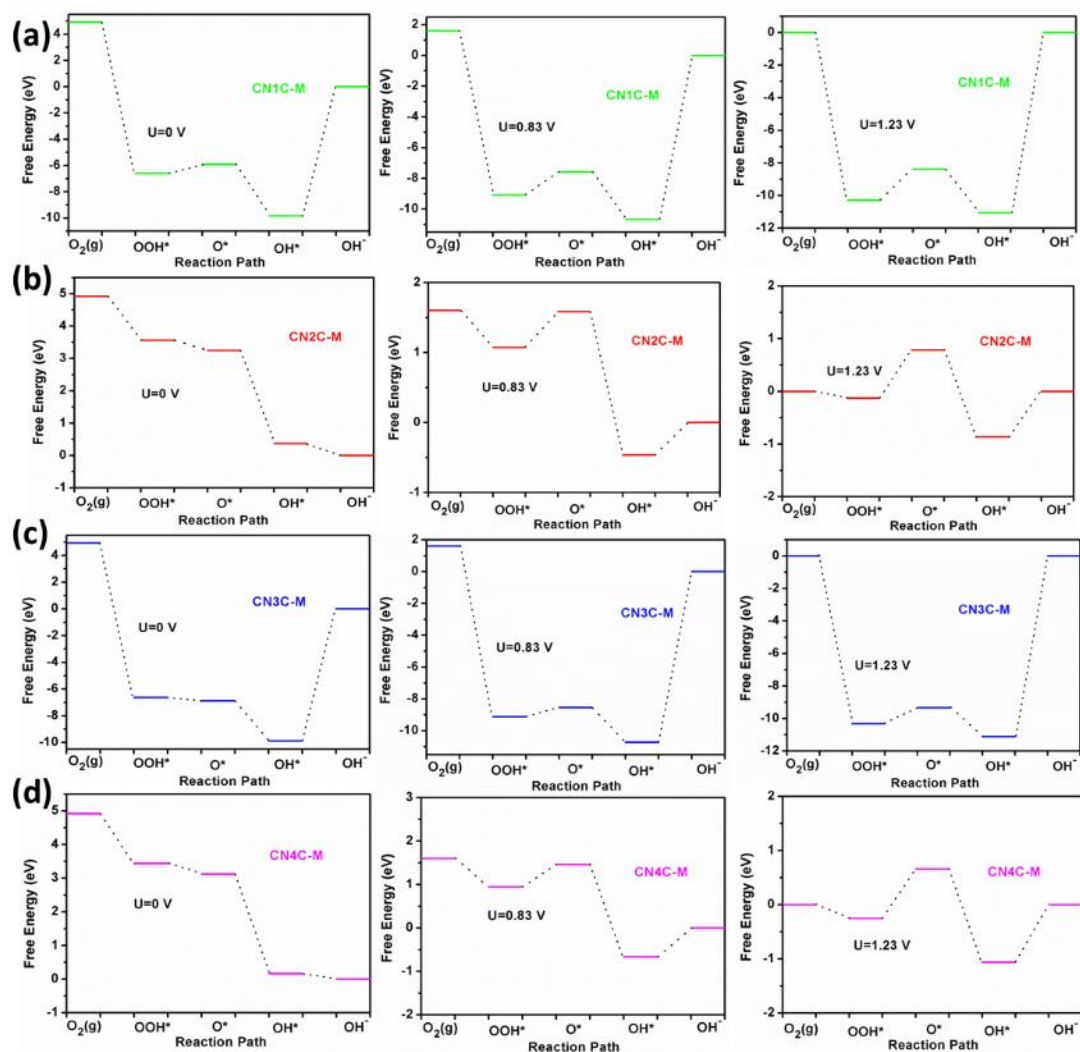

127

128 **Supplementary Figure 9.** Free-energy evolution diagram for ORR of (a) CN1C, (b)  
 129 CN2C, (c) CN3C and (d) CN4C model through a 4e- associative pathway under  
 130 electrode potential of U=0, U=0.83V and U=1.23V. The active site is set as the metal  
 131 center.

132 For Ca sites in ORR, they show downhill trend in oxygen activation step ( $O_2$   
 133 transforms to OOH) which reveals Ca sites are electrophilic for oxygenated species.  
 134 However, they show extremely large uphill energy barriers from OH release step which  
 135 causes bad ORR activity.

136 The Ca center is hampered by extremely strong binding of hydroxyl for the large  
137 energy barrier of dis-adsorption of OH\* in last step. The CN2C-M and CN4C-M show  
138 closed activity performance among CNxC models (Supplementary Table 4), and CN1C  
139 and CN3C shows the extremely large energy barriers which are caused by unstable  
140 structure as shown in Supplementary Figure 6.

141

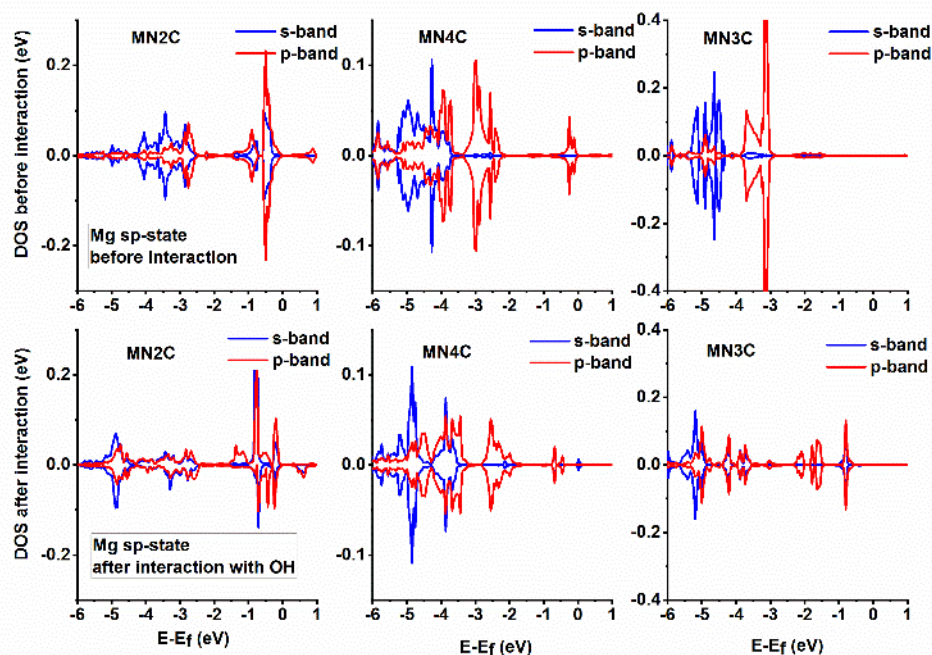

142

143 **Supplementary Figure 10.** The local DOS of Mg before and after interaction with OH.  
144 The up row shows the local DOS of Mg in cofactors (MN2C, MN4C and MN3C  
145 respectively) before interaction with OH intermediate; the down row shows the local  
146 DOS of Mg in cofactors (MN2C, MN4C and MN3C respectively) after interaction with  
147 OH intermediate.

148 It is clearly that p-state of Mg before interaction is closed to Fermi level which  
149 would influence the interaction most. After interaction with OH, p-state of Mg are  
150 renormalized and some of p-state level (-1 eV to Fermi level) are consistent with  
151 broadened  $1\pi$  state of OH adsorption which reveals that electrons donation from OH  
152 occupied the empty hybridized p-state of Mg.

153

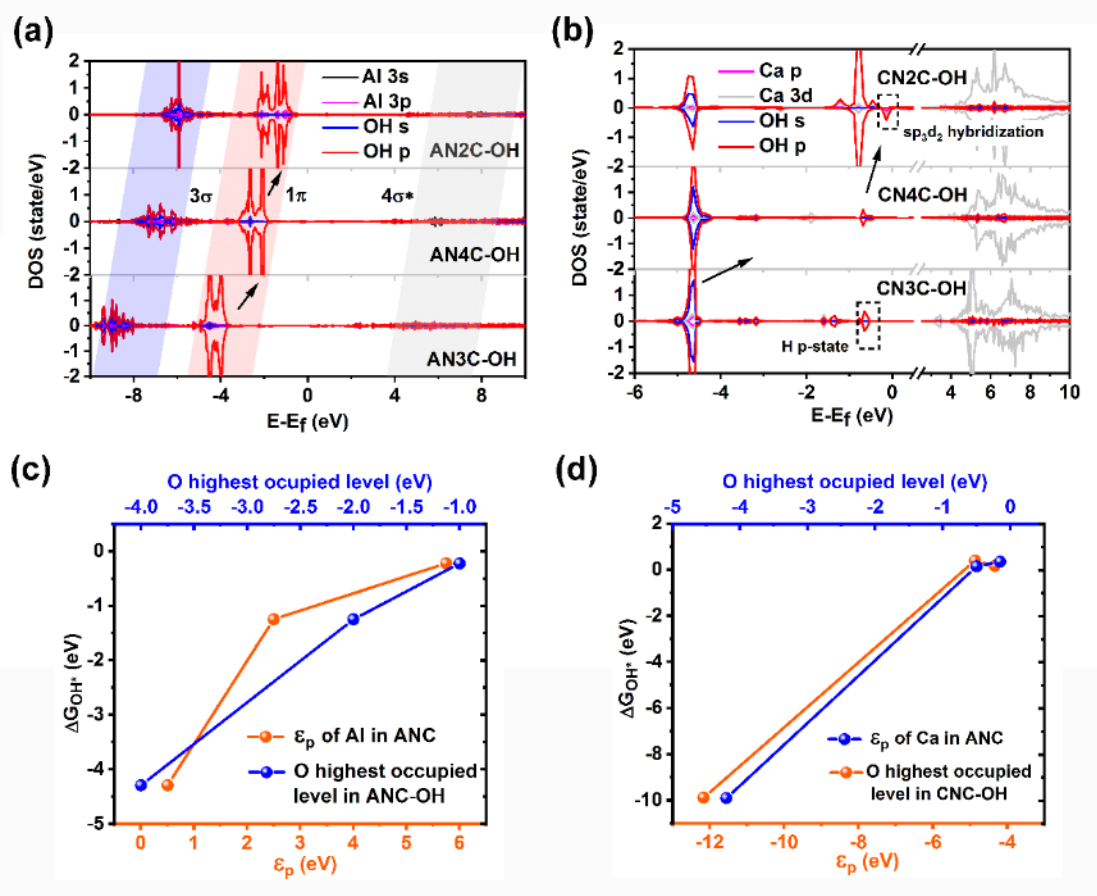

154

155 **Supplementary Figure 11.** The relationship between adsorbate strength of OH\* and  
 156 p-electron feature. (a) Projected DOS of OH adsorption at ANxC. (b) Projected DOS  
 157 of OH adsorption at CNxC. The 3d empty orbitals may participate CNxC hybridization  
 158 with  $sp^3d^2$  form. (c-d) Adsorption free energies of OH as a function of the  $\epsilon_p$  position  
 159 of metal atoms for Al (c) and Ca (d) cofactors, and also as a function of highest O  
 160 occupied state of hydroxyl after interaction. Lines are used to fit the linear relationship.

161 As shown in **Supplementary Figure 11a**, when OH molecule orbital interacted  
 162 with p-state of Al surface, they are down shifted and broadened, especially the  
 163  $3\sigma$  (from H 1s-O  $2p_z$ ) and  $1\pi$  (from lone pair O  $2p_{x,y}$  electrons) of OH molecule  
 164 orbitals, which would mainly influence the adsorption strength. As  $\epsilon_p$  of Al shifts up,  
 165 the down shifted degree of  $3\sigma$ ,  $1\pi$  and  $4\sigma^*$  of OH molecule orbital are weakened, in  
 166 other words, slightly up shifted due to the interaction between up shifted-p-state and  
 167 OH adsorption. The  $4\sigma^*$  is away from Fermi level which is negligible to influence  
 168 adsorption strength. As one can see the black arrows tagging the highest O occupied p-  
 169 state, AN2C-OH with the highest O occupied p-state processes the weakest adsorption  
 170 as tabulated in Figure 3c with sky-blue dots.

171 Similar trend is found in CNxC-OH, while empty d-state at Ca atoms may  
 172 influence OH adsorption by participation of hybridization of CNxC.

173

## 174 **1.2 Characterization of pyrolysis products and ORR performance of the catalysts**

175

176 The crystal information about Mg-HMT is given in Supplementary Table 7 and  
177 Supplementary Figure 12. And the X-ray diffraction pattern (XRD) with simulation  
178 (Supplementary Figure 13) and the further Fourier transform infrared (FTIR) confirm  
179 the coordination of Mg-HMT (Supplementary Figure 14). The scanning electron  
180 microscopy (SEM) images of the precursors are shown in Supplementary Figure 15.

181 After heat treatment, most Mg evaporated and ligand decomposed to form the N-  
182 doped carbon matrix (see thermogravimetry (TG) curves in Supplementary Figure 16).  
183 As there is no pyrolysis product for the pure ligands, Mg probably constitutes the carbon  
184 framework in pyrolysis of Mg-HMT. Transmission electron microscopy (TEM) and  
185 high resolution transmission electron microscopy (HRTEM) tests (Supplementary  
186 Figure 17) show there are no metal nanoparticles or oxides detected in catalyst obtained  
187 before and after pickling (also confirmed by XRD in Supplementary Figure 17d). Note  
188 that, as shown in Supplementary Figure 18, due to the large scale of material, the  
189 graphite (002) peak could be observed if it was not fully ground. Although there is no  
190 signal about the Mg-oxides in the XRD and TEM results, further pickling is taken to  
191 get rid of the inactive residual not detected. And the FTIR result (Supplementary Figure  
192 19) points out slight Mg-O stretching vibrations disappeared after pickling, which  
193 reveals that some tiny amorphous Mg-oxide clusters are removed and they are not  
194 active substance proved by the enhanced electrochemical performance later. And FTIR  
195 result also reveals nitrogen doping by C-N stretching vibration in Mg-N-C. The  
196 Brunauer-Emmett-Teller (BET) adsorption-desorption isotherms as shown in  
197 Supplementary Figure 20 shows the larger surface area and the increasing pore with  
198 diameter under 2nm which may be induced by the removal of oxygenated species. The  
199 high resolution transmission electron microscopy (HRTEM) image of Mg-N-C (Figure  
200 3b) confirms the porous graphitic carbon in the absence of impurity. It seems no change  
201 after pickling in XRD (Supplementary Figure 17d) where the broad peak at about  
202  $20 - 30^\circ$  indexes the (002) plane of the low degree graphitized carbon and no  
203 diffraction peak of metal or oxides is observed. Raman spectra in Supplementary Figure  
204 17e confirm that the catalysts are composed of graphene analogue doped by a large  
205 amount of heteroatoms (high ratio of D and G) <sup>1,2</sup> and no change after pickling.

206 For the XPS results, we referred the binding energy position from the NIST  
207 databases and the reported references. From NIST databases, the Mg 1s and 2p  
208 spectrum in Supplementary Figure 22 a and b clearly show that no metallic Mg signal  
209 is found (the positions of 1303-1303.5eV for Mg 1s and 49.3-49.7eV for Mg 2p) and

210 there is a +2 oxidation state of Mg in the catalyst. And the Mg-O bond position is out  
211 of range (the positions of 1303.9eV for Mg 1s and 50.25eV for Mg 2p). As shown  
212 below in Supplementary Figure 22a, the Mg 1s spectra can be deconvoluted into two  
213 peaks, one is Mg-N bond (at 1304.2eV referred to MgPc), another peak located at  
214 1305.2eV matches well with the literature reported Mg-C bond<sup>3</sup>. And also there is  
215 clearly two peaks in the Mg 2p spectra which can be deconvoluted into Mg-N bond (at  
216 50.6eV referred to MgPc) and Mg-C bond (at 52.6eV<sup>4,5</sup>). The Supplementary Figure  
217 22c shows that there are heteroatoms doped in carbon matrix in the catalyst. The C1s  
218 spectra in XPS result (as shown in Supplementary Figure 22a) is deconvoluted into  
219 different peaks at 284.7 eV, 285.7 eV, 287.4 eV, and 290.1 eV, which are attributed to  
220 C-C/C-H, C-N/C-O, C=O and  $\pi^*$ , respectively (oxygen in carbon framework is due to  
221 the in situ decomposition of oxygen-bearing ligand or remnant of air in precursor)<sup>6</sup>. In  
222 Figure S22 d, a weak peak exists at ~529.8 eV (lattice oxygen<sup>7,8</sup>) before pickling, and  
223 according to FTIR results it is the Mg-O bond. This peak disappeared after acid pickling  
224 which matches well with the FTIR results in Supplementary Figure 19 and also  
225 indicates that there is no Mg-O bond in the final Mg-N-C catalysts. The spectrum of N  
226 1s in Figure 3g can be deconvoluted into four peaks at 398.5 eV, 400.1 eV, 400.8 eV  
227 and 401.7 eV, corresponding to pyridinic-N, pyrrolic-N, Mg-N<sub>x</sub> and graphitic-N,  
228 respectively<sup>9</sup>, which reveals the N doping forms in Mg-N-C catalyst. In conclusion,  
229 XPS result confirms the existence of Mg, N co-doped in carbon based-catalyst, rather  
230 than metallic Mg.

231

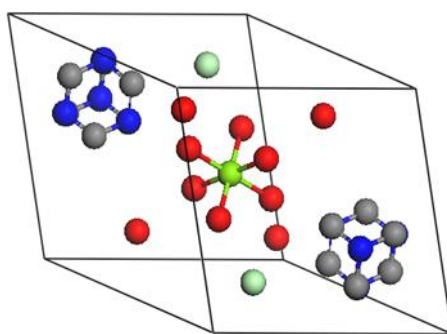

232

233 **Supplementary Figure 12.** The atomistic configuration of Mg-HMT cell. The  
234 structure is similar to that of hexaaquacobalt (II) dichloride bis  
235 (hexamethylenetetramine) tetrahydrate (Co-HMT) (Data can get from The Cambridge  
236 Crystallographic Data Centre (CCDC), CCDC number: 1184231, and Inorganic Crystal  
237 Structure Database (ICSD), ICSD number: 159012).

238

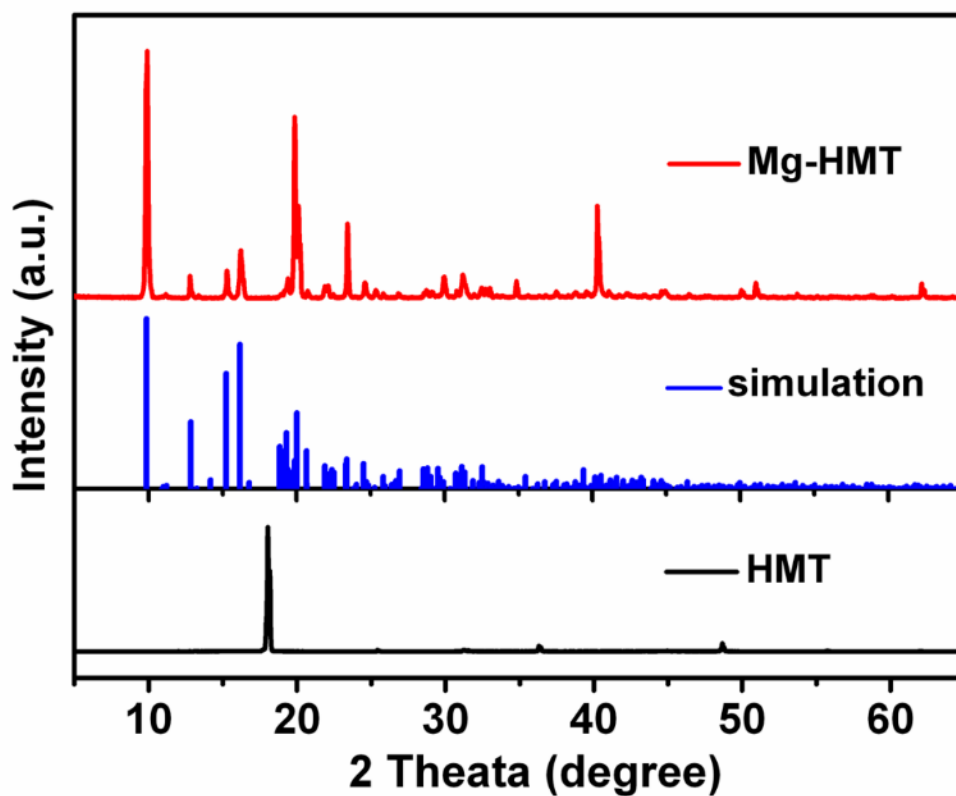

239

240 **Supplementary Figure 13.** The XRD patterns of Mg-HMT precursor. The low degree  
241 peaks of Mg-HMT match well with the XRD simulation results and are distinct from  
242 that of HMT, which reveals that the coordination from metal ions and ligand in Mg-  
243 HMT.

244



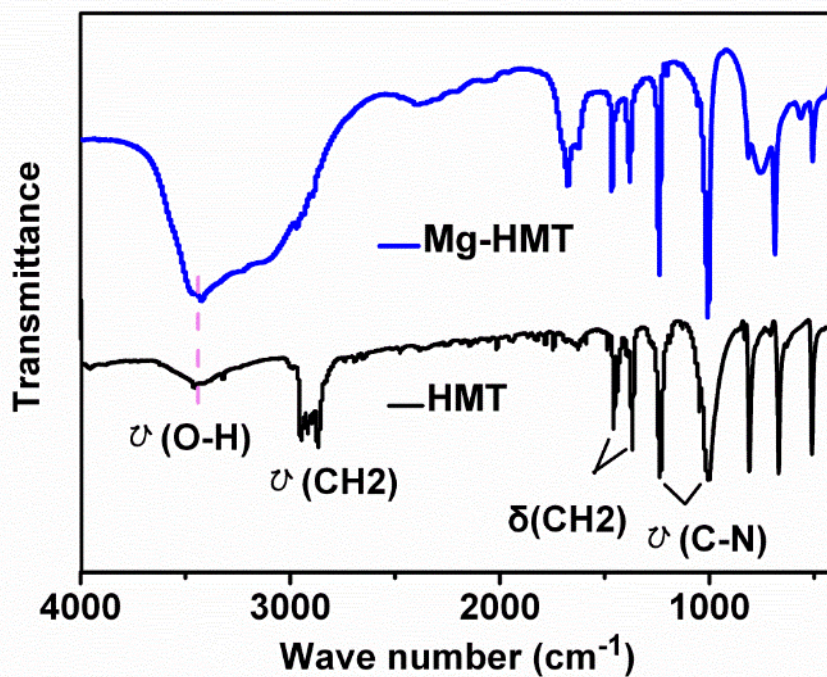

245

246 **Supplementary Figure 14.** The FTIR analyses for Mg-HMT precursor. The vibration  
 247 at  $\sim 2900\text{ cm}^{-1}$  in HMT disappears while a new enhanced vibration is observed at  $\sim 3500$   
 248  $\text{cm}^{-1}$  confirms the coordination.

249

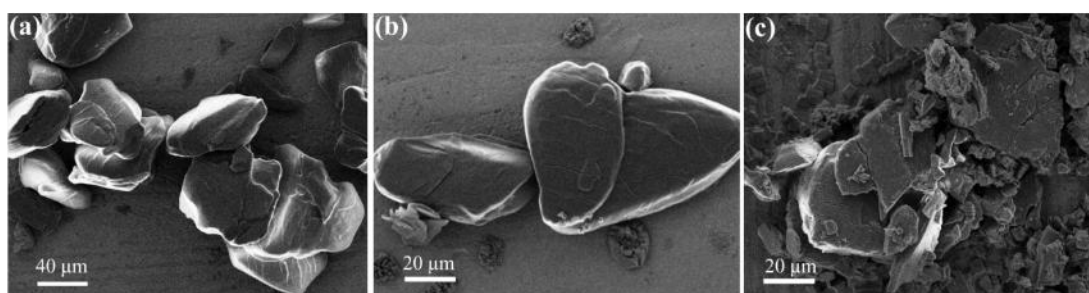

250

251 **Supplementary Figure 15.** The SEM images for Mg-HMT precursors. Particles are  
 252 shown with different sizes after drying.

253

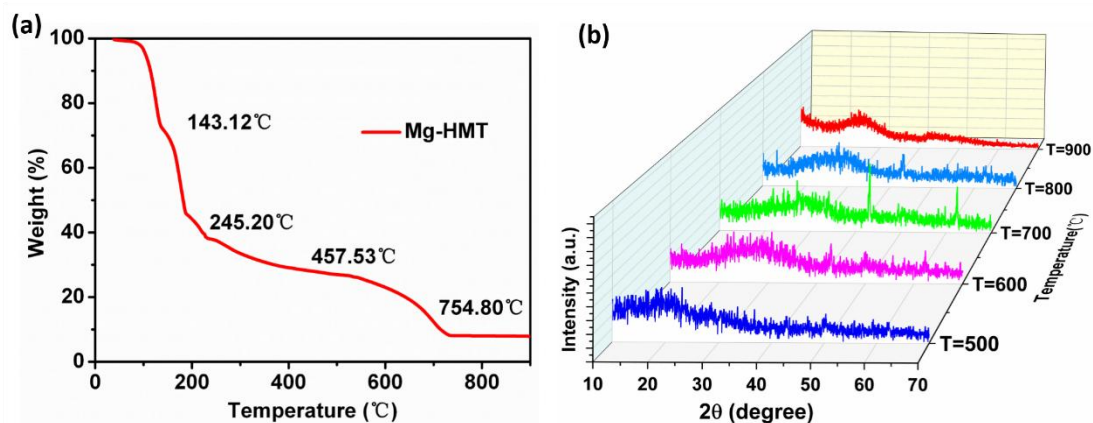

254

255 **Supplementary Figure 16.** Analysis of the formation of Mg-N-C. (a)  
 256 Thermogravimetry curve of Mg-HMT precursor and (b) corresponding XRD patterns.

257 The melting point and boiling point of metal Mg is 651 °C and 1108 °C, nano-metal  
 258 particles could be much lower due to the high surface area.

259 We had synthesized the pyrolysis of precursor Mg-HMT in different temperatures  
 260 for one hour. And we found the continuous change of pyrolysis as shown in Figure S16.  
 261 From the TGA curves of pyrolysis in Figure S16 a, there is a weight loss in temperature  
 262 range 500-700 °C. According to the Figure S16b, the precursor is not completely change  
 263 to carbon in 500 °C, until 600 °C there is a broad peak at 26-28 ° in XRD, and meantime  
 264 there is slight signal at 42.8 ° and 62.2 ° which represent the existence of MgO at this  
 265 temperature. In temperature 700 °C, the signal of MgO is stronger than that of in  
 266 temperature 600 °C, which reveals the MgO amount is become more. While it is weaker  
 267 in temperature 800 °C and is almost absence in temperature 900 °C.

268 It is interesting and we had referred the references. It had been reported that the  
 269 MgO can be reduced by carbon<sup>10,11</sup> and especially it can be occurred at 900 °C<sup>10</sup>, so we  
 270 think the MgO is dioxide by carbon and transferred to Mg and CO<sup>10</sup> in pyrolysis, and  
 271 we found the quartz crucible is polluted so that it turned to be gray with metallic luster  
 272 after heat treatment in temperature 900°C. Although XRD patterns didn't give a  
 273 apparently signal of MgO in pyrolysis in temperature 900 °C before acidic etching, XPS  
 274 still showed a weak signal of lattice oxygen referred to Mg-O bond as shown in Figure  
 275 S22 d, so these results confirms the reduction of MgO by carbon and a little amount  
 276 MgO undetected maybe existence in the pyrolysis in temperature 900 °C. It also  
 277 indicates that the Mg cofactors probably be formed at around temperature 900 °C in this  
 278 reduction process. There are some papers verified this similar transformation process,  
 279 like FeO<sub>x</sub> is transferred to Fe-N coordination in the pyrolysis<sup>12-14</sup>.

280

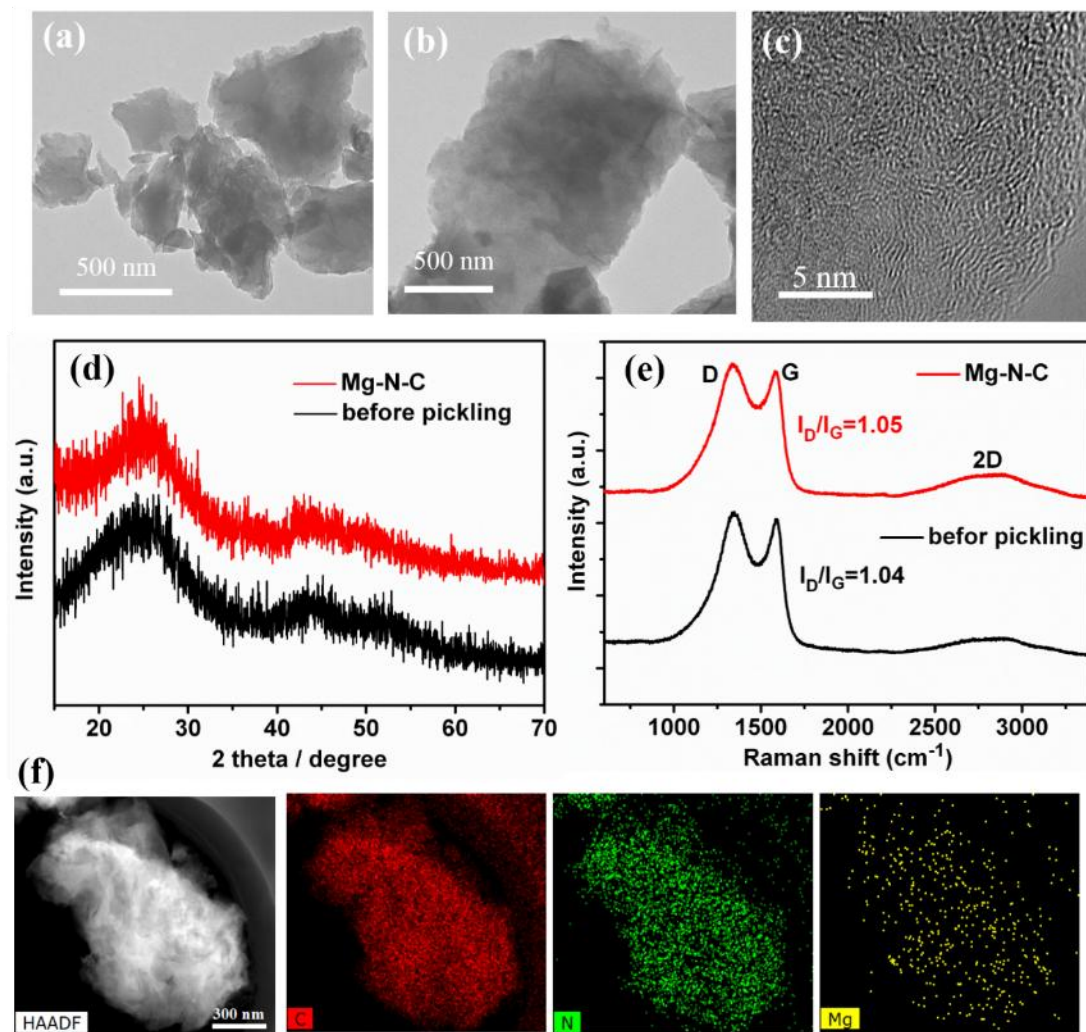

281

282 **Supplementary Figure 17.** The morphology and structural characterization. (a-b) The  
 283 TEM images about the catalysts before and after acid pickling. (c) HRTEM image of  
 284 the graphitized carbon Mg-N-C before pickling. No metal nanoparticles or oxide is  
 285 observed. (d-e) The XRD patterns and the Raman spectrum for the catalysts before and  
 286 after etching treatment. There is no obvious change. (f) The Energy dispersive X-ray  
 287 spectroscopy (EDS) images about the elements distribution of C, N and Mg in Mg-N-  
 288 C catalysts.

289

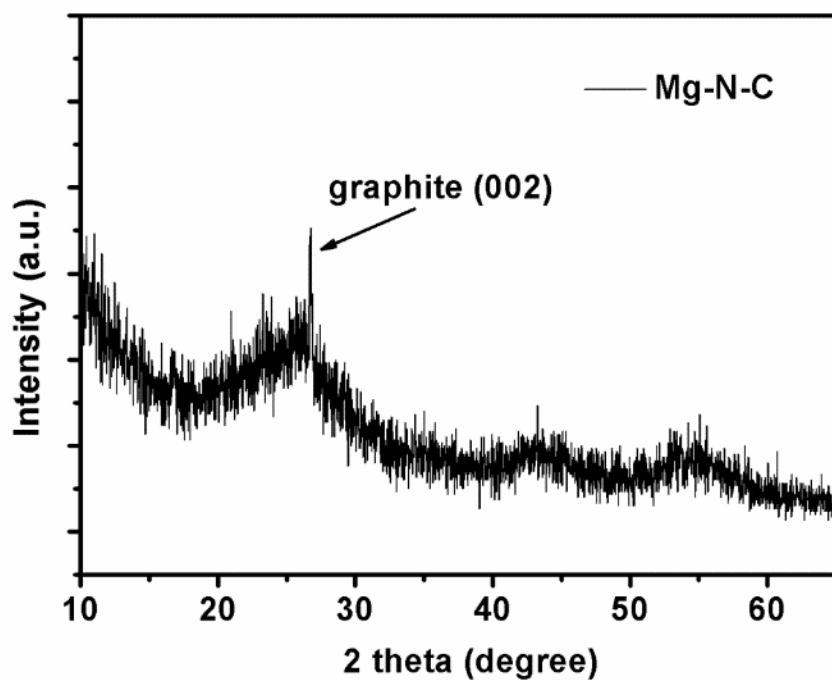

290

291 **Supplementary Figure 18.** XRD pattern of Mg-N-C with large particles. Graphite  
 292 (002) peak<sup>15</sup> is observed since the products are not fully ground.

293

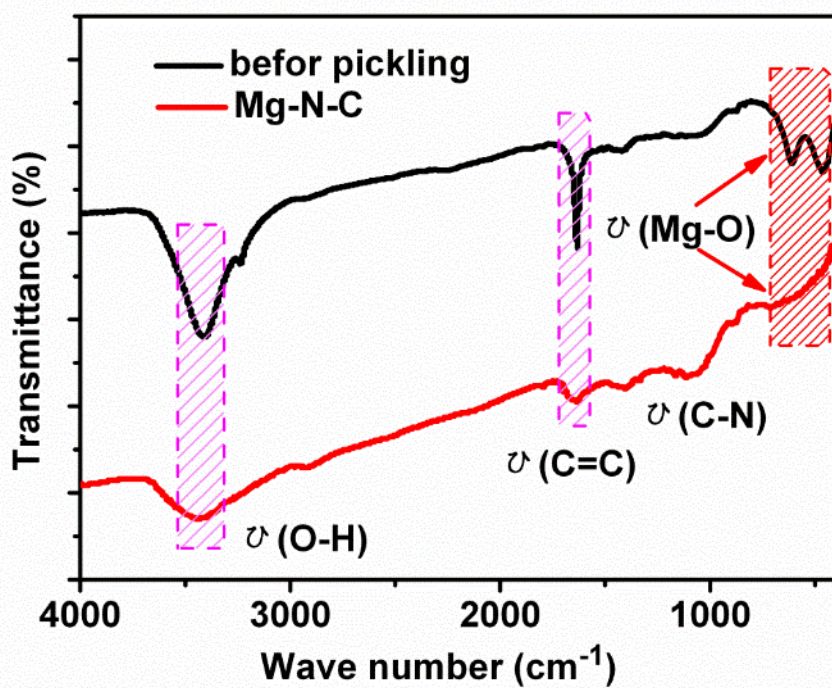

294

295 **Supplementary Figure 19.** FTIR analysis for the pyrolysis products. The peak at  $\sim 500$   
296  $\text{cm}^{-1}$  <sup>16</sup> in the product before pickling disappears in the curve for Mg-N-C, which  
297 indicates that no Mg-O exists after pickling.

298

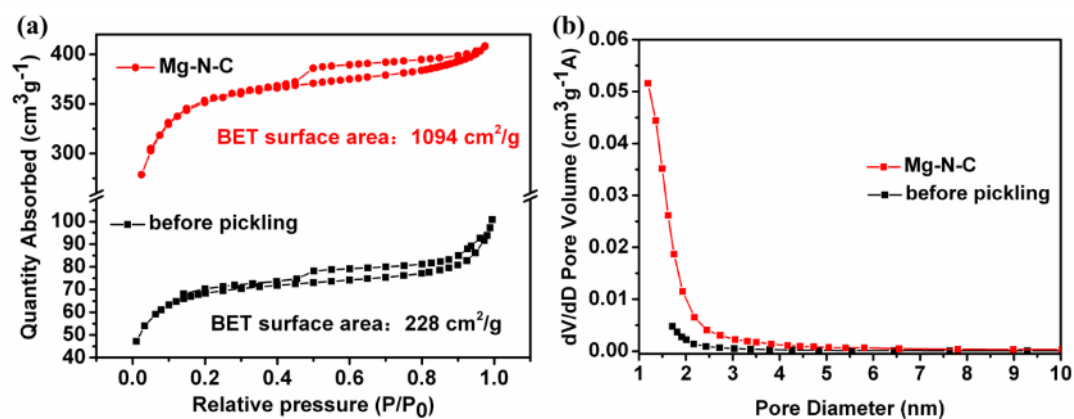

299

300 **Supplementary Figure 20.** The BET adsorption-desorption isotherms for products  
301 before and after pickling. The larger surface may expose more active sites after pickling  
302 and improve the ORR performance.

303

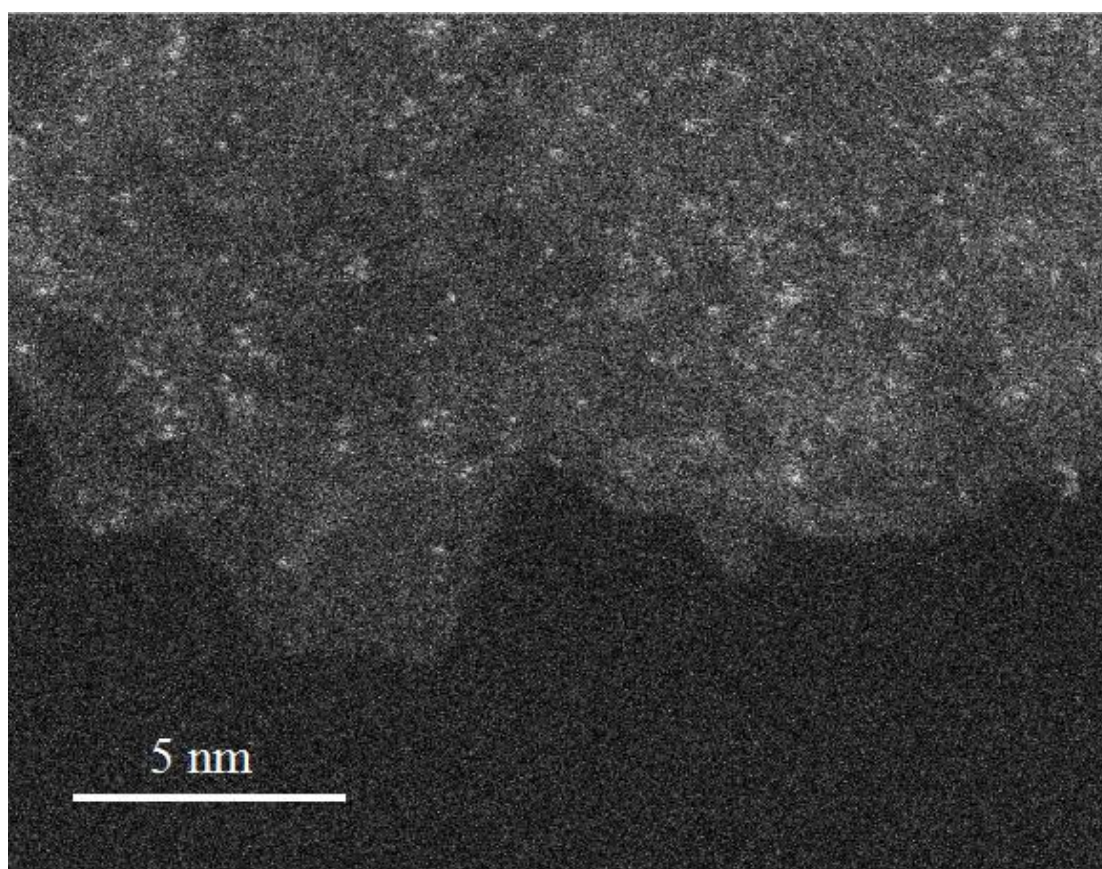

304

305 **Supplementary Figure 21.** HAADF-STEM image of Mg-N-C in large scale. The  
306 bright dots are isolated Mg atoms in graphitic carbon matrix.

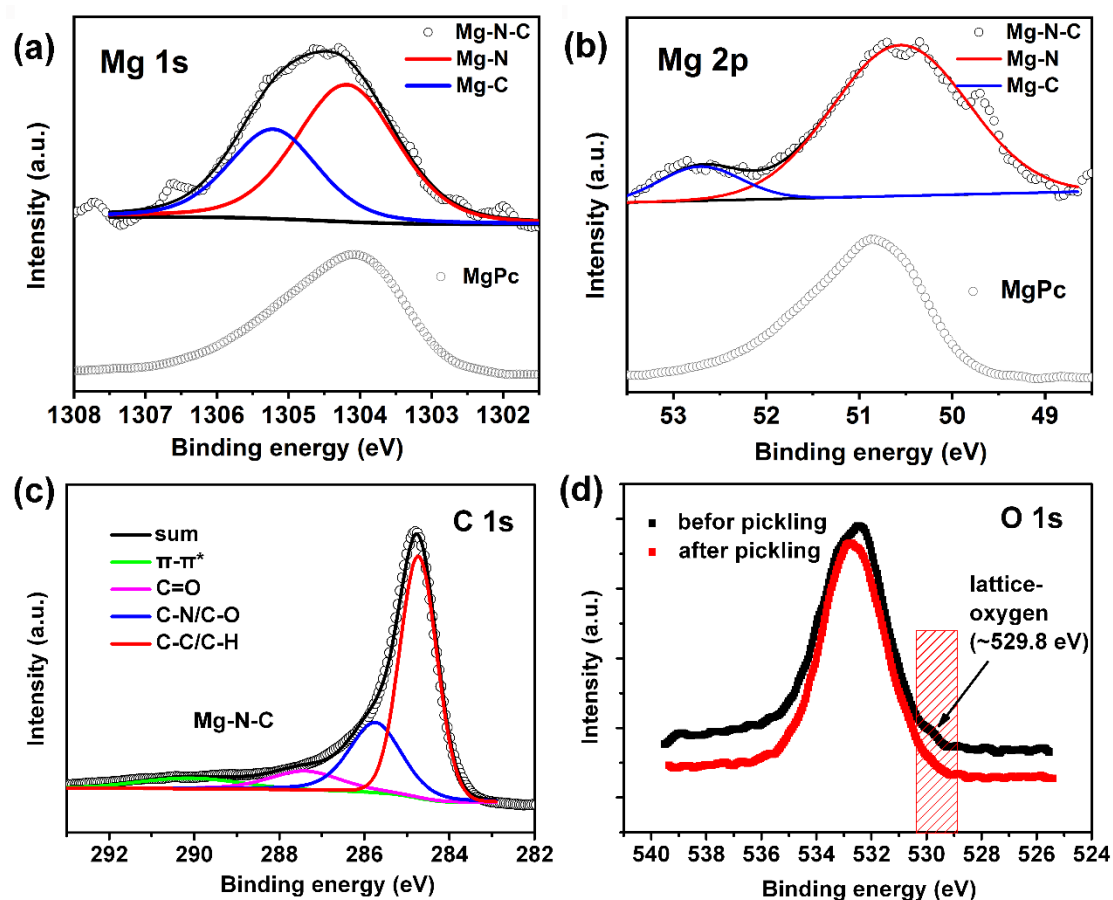

307

308 **Supplementary Figure 22.** The valence state of elements in Mg-N-C catalyst from  
309 XPS. (a and b) Mg 1s and 2p spectra in Mg-N-C and Mg-Pc as referred. (c) C 1s  
310 spectrum. (d) The O 1s signal from XPS before and after pickling.

311 For the XPS results, we referred the binding energy position from the NIST  
312 databases and the reported references. From NIST databases, the Mg 1s and 2p  
313 spectrum in Figure a and b clearly show that no metallic Mg signal is found (the  
314 positions of 1303-1303.5eV for Mg 1s and 49.3-49.7eV for Mg 2p) and there is a +2  
315 oxidation state of Mg in the catalyst. And the Mg-O bond position is out of range (the  
316 positions of 1303.9eV for Mg 1s and 50.25eV for Mg 2p). As shown below in  
317 Supplementary Figure 22a, the Mg 1s spectra can be deconvoluted into two peaks, one  
318 is Mg-N bond (at 1304.2eV referred to MgPc), another peak located at 1305.2eV  
319 matches well with the literature reported Mg-C bond<sup>3</sup>. And also there is clearly two  
320 peaks in the Mg 2p spectra which can be deconvoluted into Mg-N bond (at 50.6eV  
321 referred to MgPc) and Mg-C bond (at 52.6eV<sup>4,5</sup>). The Figure c shows that there are  
322 heteroatoms doped in carbon matrix in the catalyst. In Figure d, a weak peak exists at  
323 ~529.8 eV (lattice oxygen<sup>7,8</sup>) before pickling, and according to FTIR results it is the

324 Mg-O bond. This peak disappeared after acid pickling which matches well with the  
325 FTIR results in Supplementary Figure 19 and also indicates that there is no Mg-O bond  
326 in the final Mg-N-C catalysts.

327

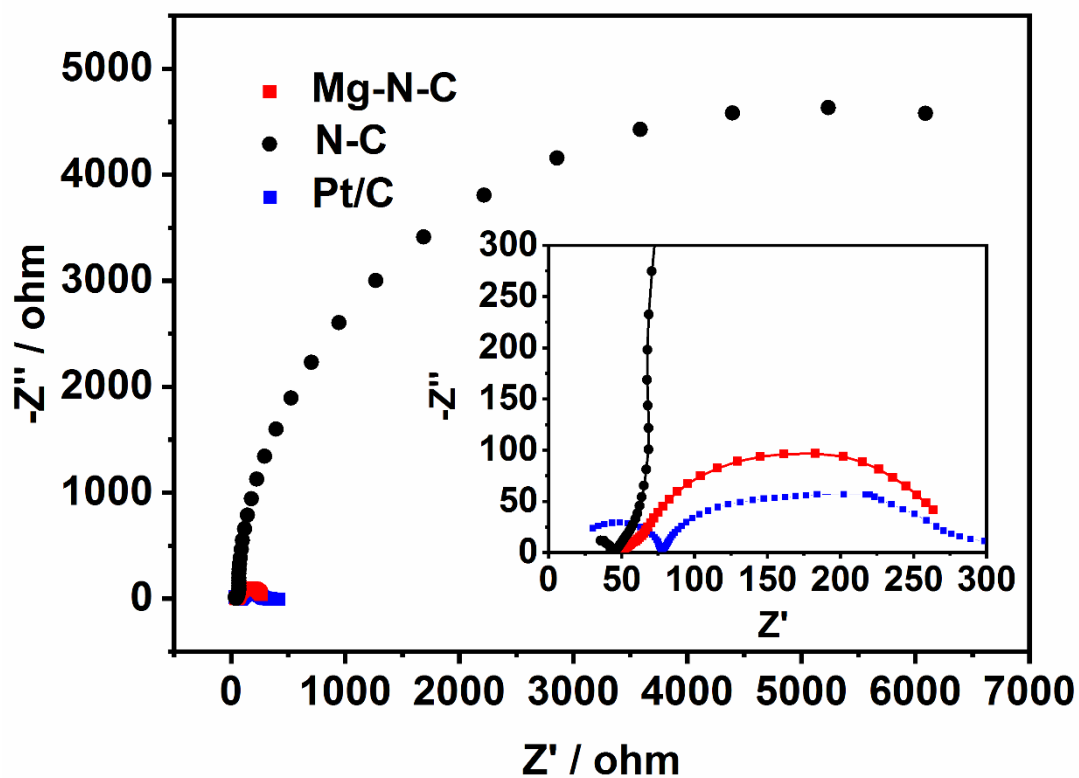

328

329 **Supplementary Figure 23.** Electrochemical impedance spectroscopy (EIS) of Mg-N-  
330 C. Insert is the larger scale of EIS. Mg-N-C has much lower charger transfer resistance  
331 than that of N-C and is close to Pt/C which contributes faster electrons transfer at  
332 catalyst surface.

333

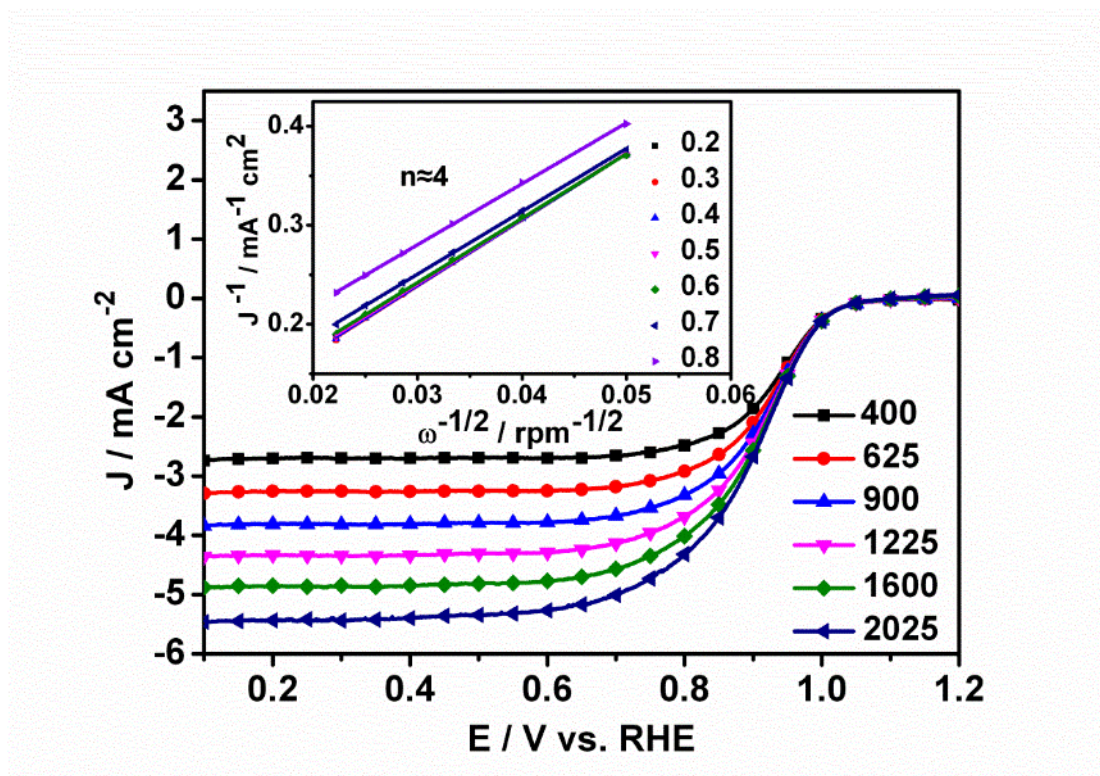

334

335 **Supplementary Figure 24.** The dependence of LSV on different rotation rates for Mg-  
 336 N-C catalyst during the RDE test (the label for different curves is rpm). The insert  
 337 shows the electrons transfer number calculated according to the the K-L equation (the  
 338 label for different curves is  $V$ ).

339



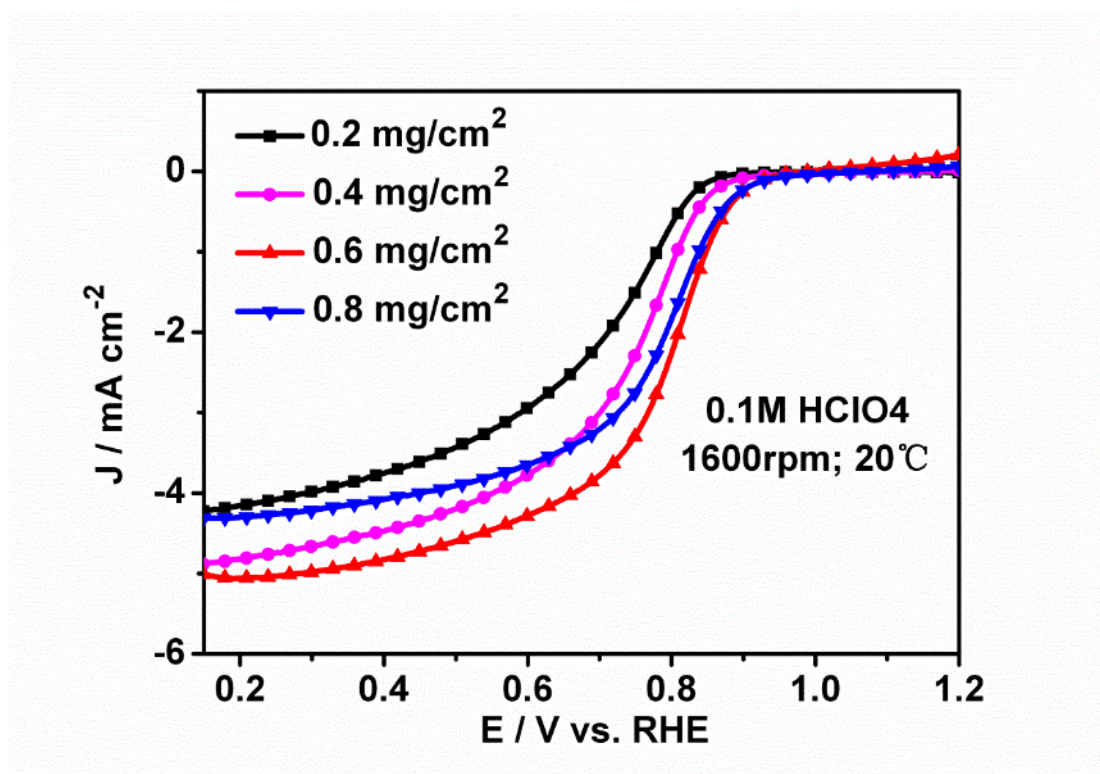

340

341 **Supplementary Figure 25.** The loading dependence of  $E_{1/2}$  of Mg-N-C with 1600 rpm  
 342 in 0.1M HClO4 solution.

343

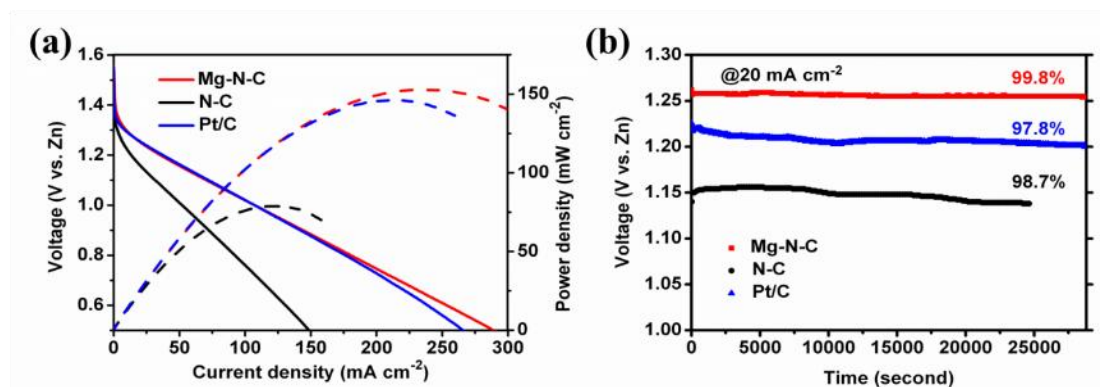

344

345 **Supplementary Figure 26.** The comparison of zinc-air battery performance of Mg-N-  
 346 C with N-C and Pt/C catalysts. (a) The power density of catalysts. (b) Constant current  
 347 discharge test. The Mg-N-C shows better performance than Pt/C and excellent stability  
 348 over time.

349

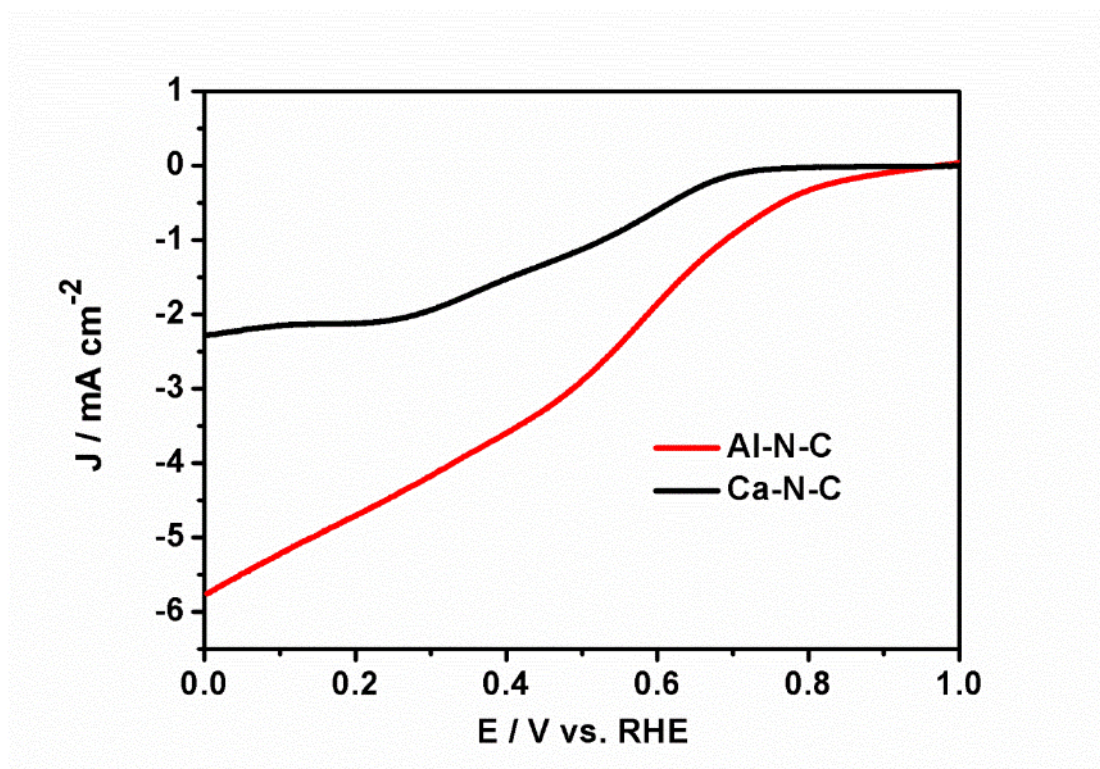

350

351 **Supplementary Figure 27.** The ORR performance of Al-N-C and Ca-N-C.

352

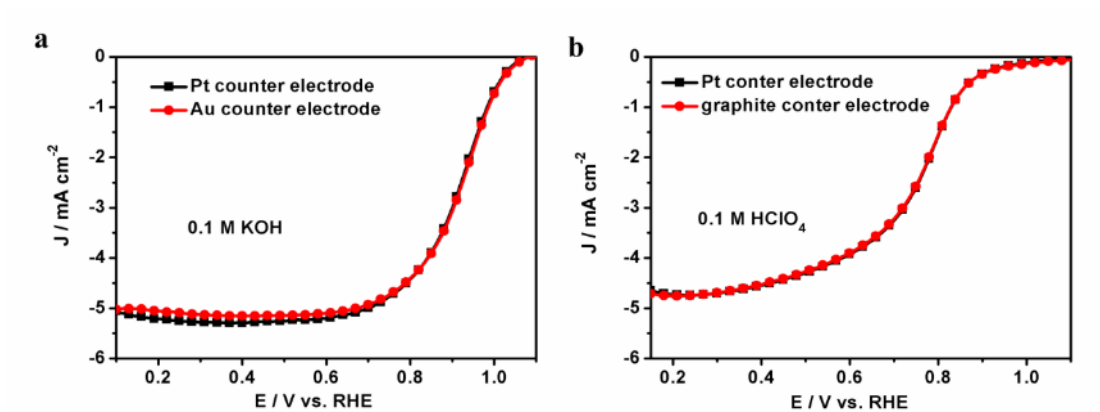

353

354 **Supplementary Figure 28.** The comparison of the influence from different counter  
 355 electrodes used in (a) basic solution and (b) acidic solution. It clearly shows that there  
 356 is almost no change when alter the counter electrodes in initial ORR performance test.

357

358

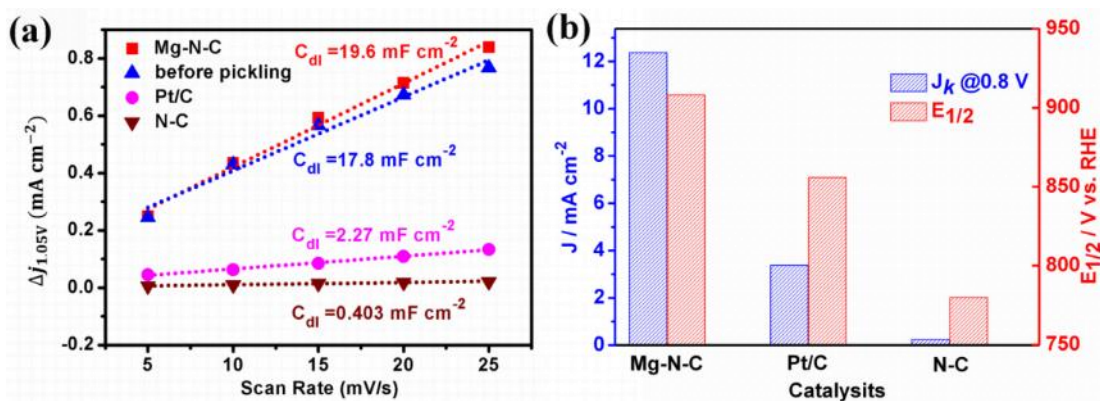

359

360 **Supplementary Figure 29.** Electrochemical evaluation of Mg-N-C. (a) The double  
 361 layer capacitance ( $C_{dl}$ ) of catalysts, which is used to represent the ECSA. (b) The  
 362 kinetic current density ( $J_k$ ) of catalysts to evaluate the ORR performance.

363 With higher value of  $C_{dl}$ , the ECSA lined with  $C_{dl}$  is larger. The Mg-N-C shows  
 364 the highest value of  $C_{dl}$  and so as the product before pickling which indicated the high  
 365 intrinsic ORR activity of Mg-Nx structure. The larger ECSA of Mg-N-C than catalyst  
 366 before pickling may be caused by the acid etching which opens the pore structure. Due  
 367 to the ECSA value from this method is inaccurate (always much higher than real  
 368 reaction active sites) caused from extra carbon active sites<sup>17,18</sup>, the standardized current  
 369 density from ECSA ( $j_{ECSA} = \frac{j}{ECSA}$ ) is underestimated, so we only the standardized

370 current density from geometric area ( $j_{Geom} = \frac{j}{A_{Geom}}$ ) to evaluate the performance of  
 371 catalysts, meanwhile the  $C_{dl}$  to represent the ECSA.

372 Meantime, we also use kinetic current density ( $J_k$ ) to evaluate the ORR  
 373 performance of catalysts, as shown in Fig. b, and Mg-N-C shows the highest value up  
 374 to  $12.4 \text{ mA cm}^{-2}$ , which is better than  $7.2 \text{ mA cm}^{-2}$  of Pt/C and  $0.4 \text{ mA cm}^{-2}$  of N-C.

375

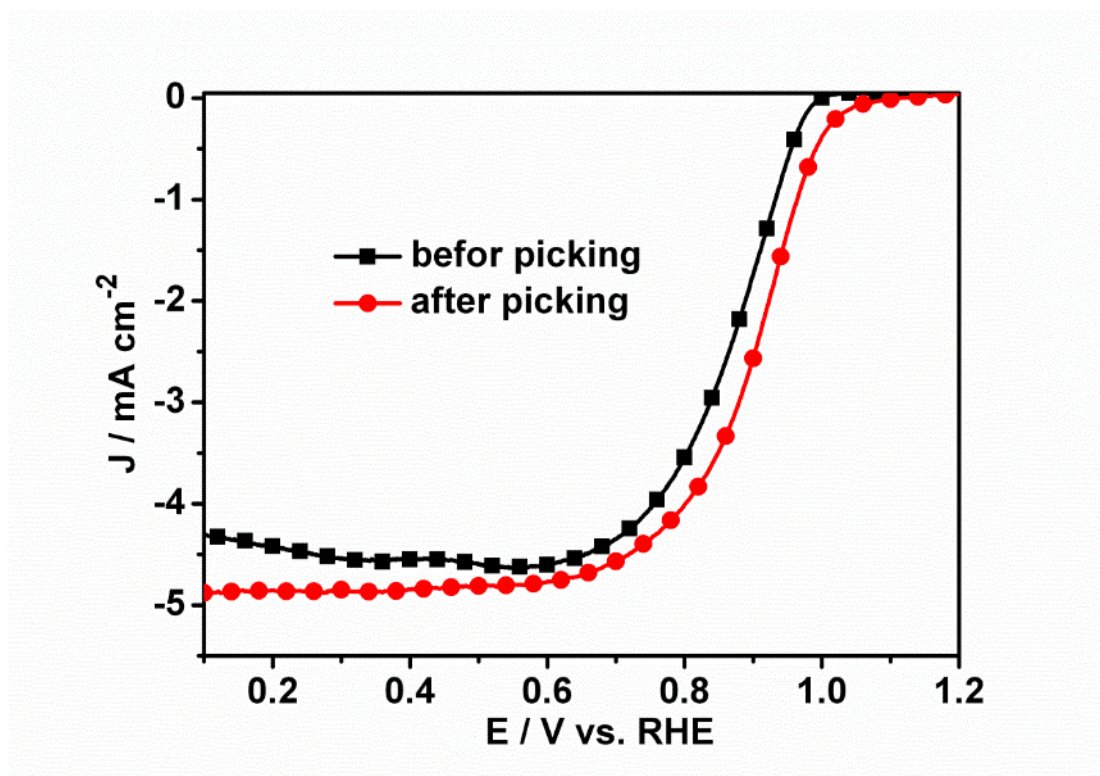

376

377 **Supplementary Figure 30.** The effect of pickling on ORR performance of Mg-N-C  
378 catalysts.

379 After pickling, the LSV curve shows slightly right shift, indicating enhanced  
380 catalytic activity. This is caused by larger BET surface area in the products after  
381 pickling as illustrated in Supplementary Figure 20.

382

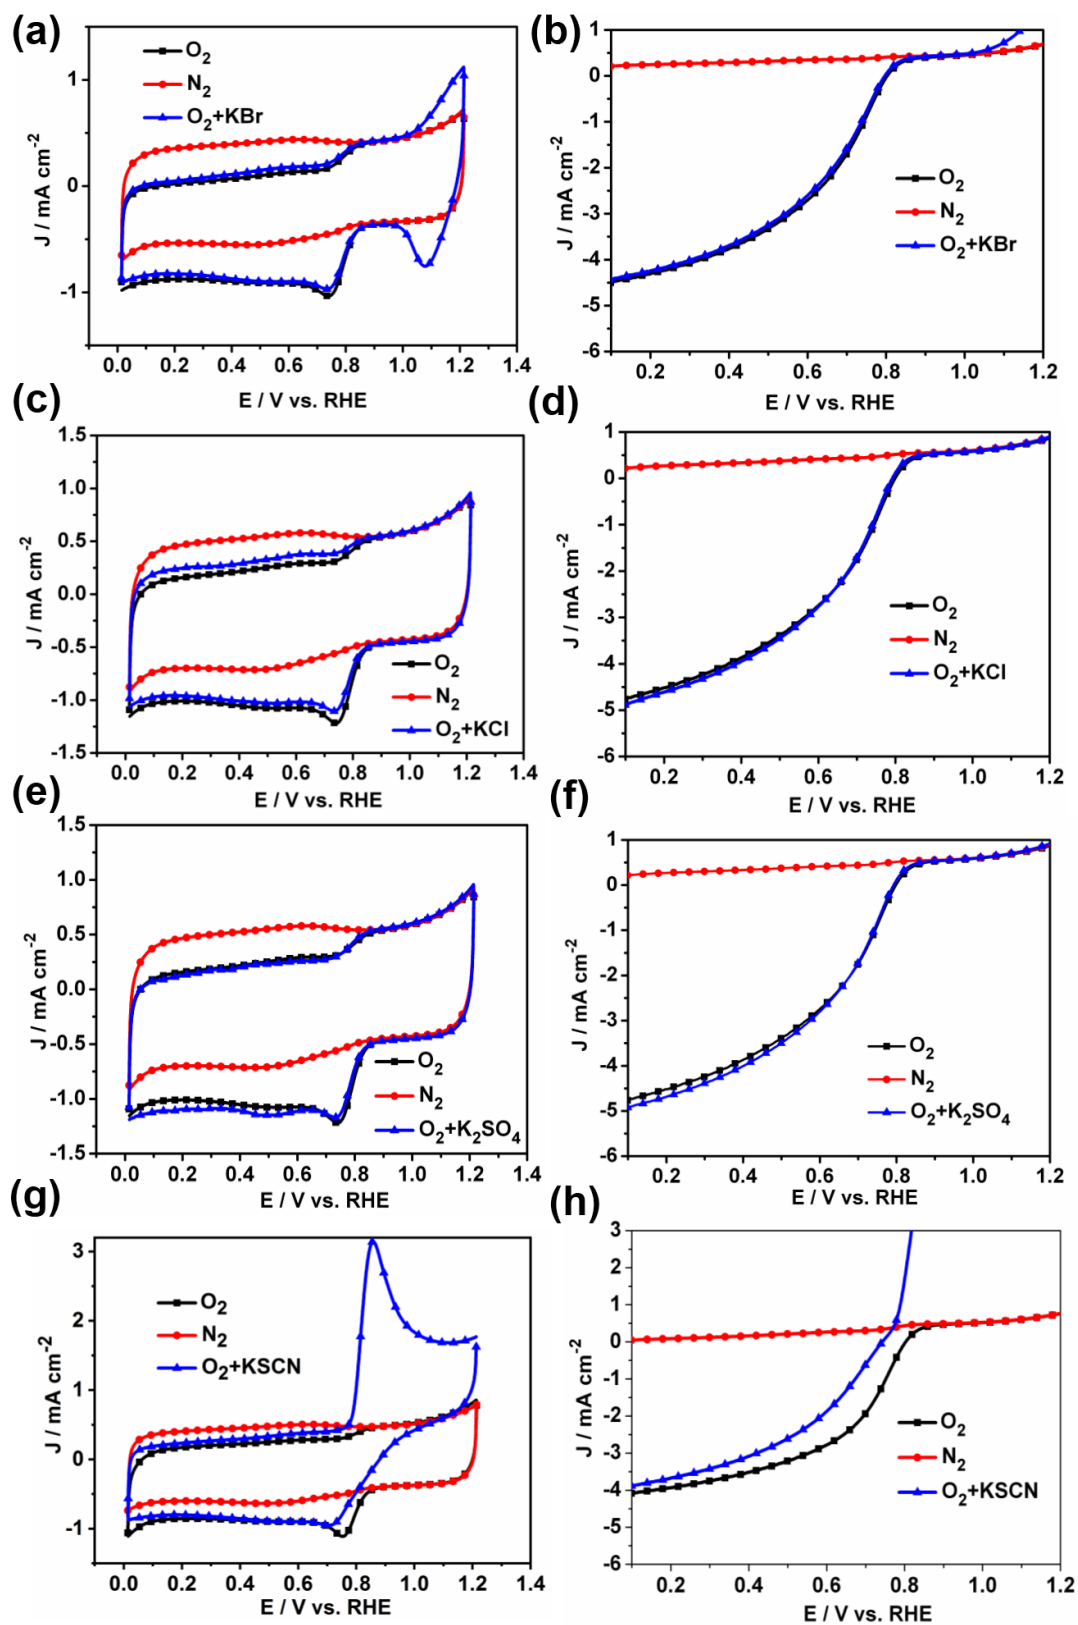

383

384 **Supplementary Figure 31.** Poisoning effect of the Mg-N-C catalyst tested. CV and  
 385 LSV measurements were carried by adding different anions (0.01M) into the solution.  
 386 (a-b) Adding KBr. (c-d) Adding KCl. (e-f) Adding K<sub>2</sub>SO<sub>4</sub>. (g-h) Adding KSCN.

387 KSCN can block metal sites and poisons the active sites<sup>19–22</sup>, as shown in (g and  
388 h), after adding 0.01M KSCN, there is a negative shift of 109 mV in  $E_{1/2}$ , indicating  
389 loss of activity. While it still has an  $E_{1/2}$  of more than 610mV. This result confirms the  
390 activity contribution of metal Mg sites but also inferred the activity contribution of  
391 carbon sites<sup>23,24</sup>. Other anions like  $\text{Br}^-$ ,  $\text{Cl}^-$  and  $\text{SO}_4^{2-}$  were almost unaffected. This result  
392 indicates that the active site in Mg-N-C is the metal site Mg, instead of nitrogen or  
393 carbon.

394

### 395 **1.3 Characterization of post-doped Mg in N-C host and ORR performance of the** 396 **catalysts**

397 It shows obvious catalytic activity enhancement in both alkaline and acidic  
398 environments when adding Mg and N sources (N-C-3Mg) (Supplementary Figure 32b  
399 and d) and the performance are even comparable to pre-doped Mg-N-C catalyst in last  
400 part. The control group with same mole ratio addition of Al and N source (N-C-3Al) at  
401 same condition is also synthesized and it shows much poor activity no more change  
402 than that with only N source addition (N-C-no metal). It proves the Mg-N<sub>x</sub> moiety  
403 formed by Mg doping is active rather than that by Al doping. And more, N doping is  
404 also a little helpful (see a slight activity increase in N-C-no metal than the original N-  
405 C (N-C-pristine)) which reveals they are not the main activity contributor. To validate  
406 the activity attribution of Mg addition, different Mg source contents but same N source  
407 contents were added in N-C host. The catalyst with higher content of Mg source  
408 addition (N-C-3Mg) shows better performance than the lower one with a third of Mg  
409 addition (N-C-1Mg), and they are both much better than the catalyst with only N  
410 sources but no Mg addition (N-C-0Mg) (Supplementary Figure 32c and e), which  
411 reveals that there are more Mg-N<sub>x</sub> moieties by increase Mg doping in N-C-3Mg and  
412 improves the activity. Moreover, even synthesized with only Mg source but no N  
413 addition in N-C host (N-C-3Mg-no N source), Mg doping can promote the activity than  
414 N-C-pristine, this is mainly contributed from the unsaturated N sites in the N-C host  
415 which give the binding sites for Mg and form the Mg-N<sub>x</sub> moieties.

416 To prove the existence of Mg-N<sub>x</sub> moieties, The XRD and FTIR results  
417 (Supplementary Figure 31), and HRTEM images (Supplementary Figure 32) proves  
418 that no metal atoms or metal oxide exists in the graphitized carbon catalysts.  
419 Furthermore, EDS images in Supplementary Figure 35 indicate that Mg is uniformly  
420 distributed in samples. The XPS results in Supplementary Figure 36a reveals that with  
421 the increment of Mg content, the intensity of Mg (2+) becomes stronger, which leads  
422 to the increment in  $E_{1/2}$  under both the alkaline and acidic conditions. The activity in  
423 basic solution (Supplementary Figure 36b) and acidic solution (Supplementary Figure

424 36c) is directly correlated with Mg contents (red polyline) but N contents or N doping  
 425 forms. Note that there is no Fe contamination in the catalysts are observed as shown in  
 426 Supplementary Table 10. Thus, all the results above prove that there are Mg-Nx  
 427 moieties existing in the Mg-N-C catalysts, which works as the active site in ORR tests  
 428 and promotes the catalytic performance of the catalysts.

429

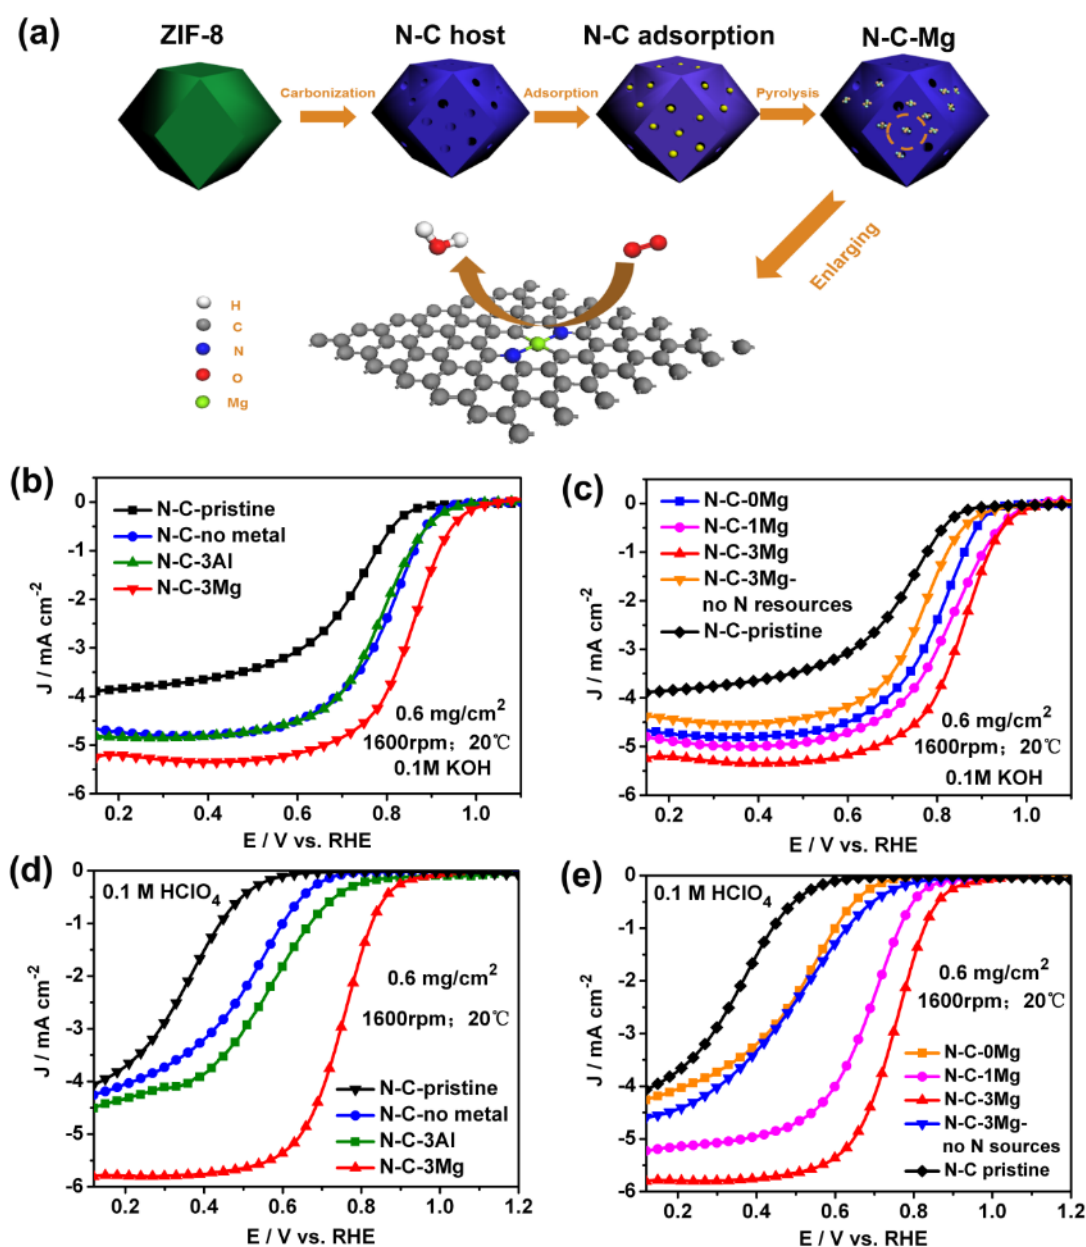

430

431 **Supplementary Figure 32.** The synthesis diagrams of post-doped Mg cofactor in N-C  
 432 host and the relationship between ORR performance and Mg doping contents. The  
 433 normalized LSV curves are recorded at a sweep rate of  $10 \text{ mV s}^{-1}$ . (a) The synthesis  
 434 process diagrams, ZIF-8 is transferred into nitrogen-doped porous carbon (N-C host)  
 435 after carbonization and etching, then metal and N sources are adsorbed in N-C host and

436 N-C-X (X represents the metal doping) is obtained after further pyrolysis. (b) The ORR  
437 performance from effect of metal-nitrogen sources addition in alkaline condition and  
438 (d) in acidic condition. (c) The ORR performance from effect of different Mg source  
439 contents addition in alkaline condition and (e) in acidic condition.

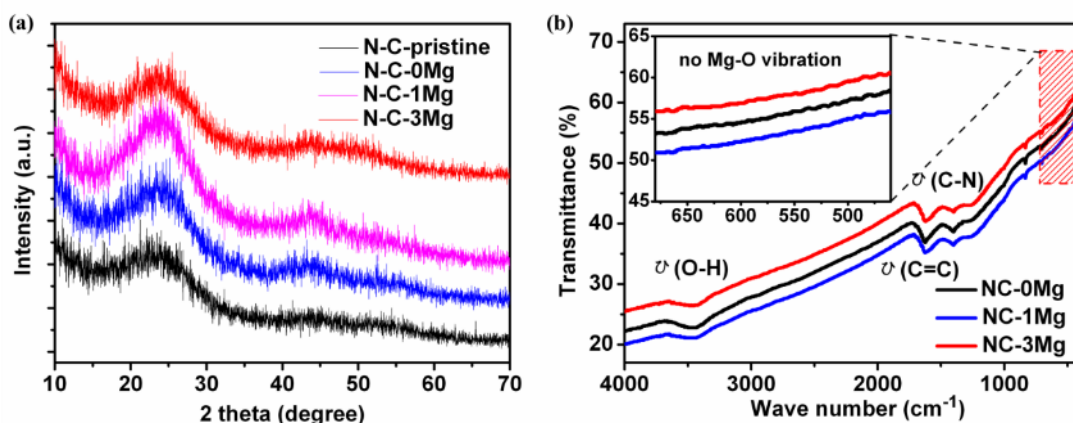

440

441 **Supplementary Figure 33.** The XRD patterns and FTIR spectra for the post-doped  
442 catalysts. (a) Carbon diffraction peaks appear in all four catalysts and become stronger  
443 when the Mg content increases. No metal or oxides in the final products. (b) FTIR  
444 spectra shows that no Mg-O stretching vibrations at ~500 cm<sup>-1</sup> are observed, indicating  
445 that metal oxides are removed in the catalysts.

446



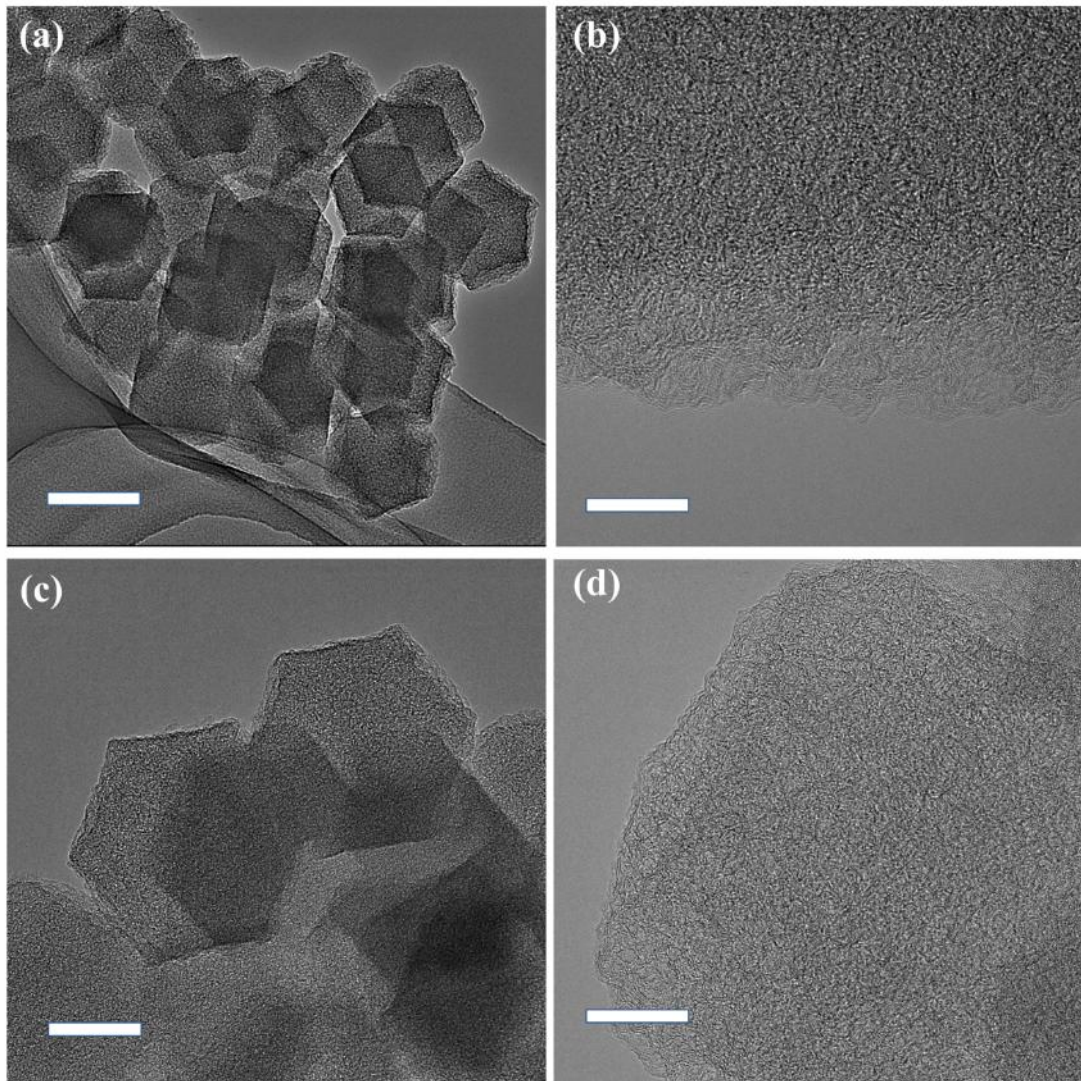

447

448 **Supplementary Figure 34.** The HRTEM images for post-doped graphene-based Mg-  
449 N cofactors. (a-b) the images for N-C-1Mg at different scales (a: 100 nm; b: 10 nm).  
450 (c-d) the images for N-C-3Mg at different scales (c: 50 nm; d: 10 nm). There are no  
451 metal or metal oxides are observed in the products, indicating the formation of Mg  
452 doping.

453

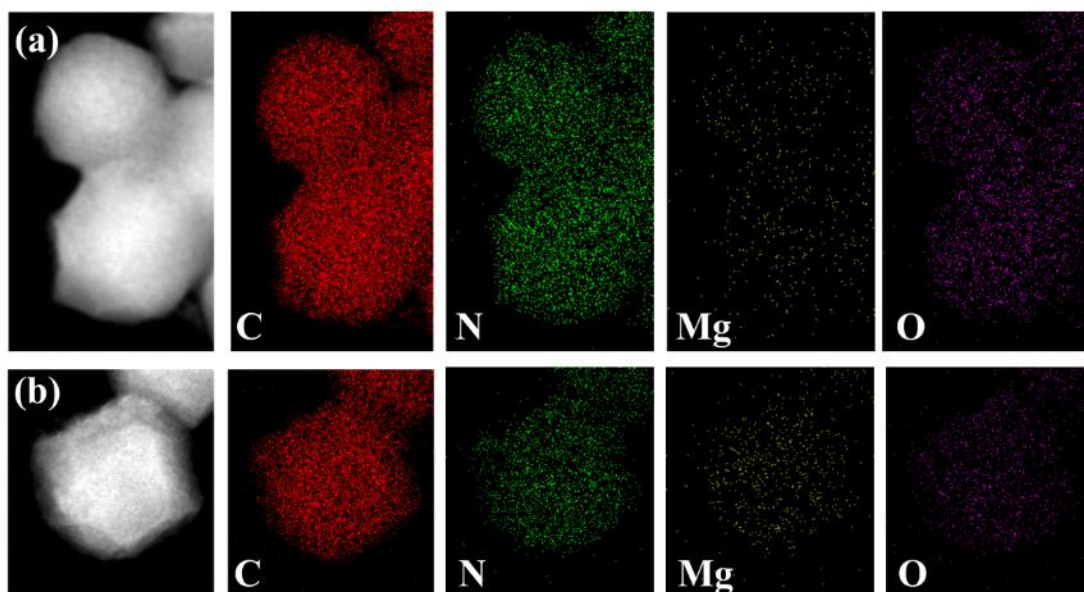

454

455 **Supplementary Figure 35.** EDS maps shows the uniform distribution of Mg elements  
 456 in the catalysts. (a) Elements distribution on N-C-1Mg. (b) Elements distribution on N-  
 457 C-3Mg. Stronger Mg signal is observed in single particle of N-C-3Mg that in N-C-1Mg,  
 458 indicating larger Mg content in the catalysts.

459

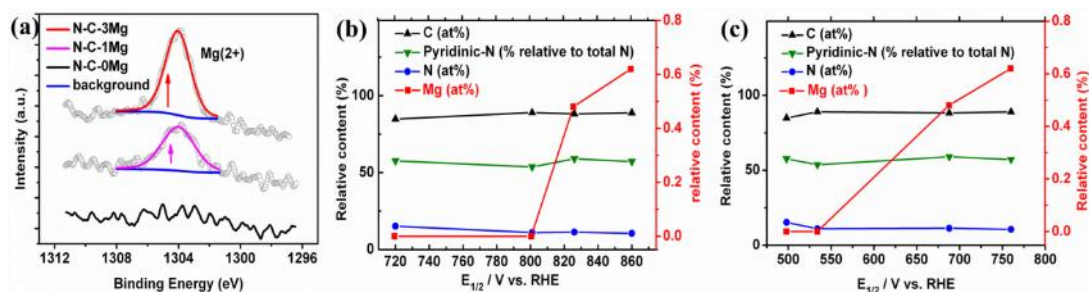

460

461 **Supplementary Figure 36.** The relationship between different Mg doping contents in  
 462 catalysts and the ORR performance under both alkaline and acidic condition, data from  
 463 XPS results. (a) With the content of Mg increases, the Mg 1s signal becomes stronger.  
 464 (b) The relation of half-wave potential ( $E_{1/2}$ ) of catalysts and elements contents in basic  
 465 solution. (c) The relation of half-wave potential ( $E_{1/2}$ ) of catalysts and elements contents  
 466 in acidic solution.

467 The ORR performance is directly correlated with Mg contents as shown in red  
 468 polyline while no more relation with C, N and Pyridinic-N doping forms. Here,  
 469 although N doping slightly improves the activity (as shown in Supplementary Figure  
 470 32, the N-C-no metal is better than N-C-pristine) but contents in N-C-pristine is higher  
 471 than post-doped catalysts after thermal treatment, so N doping content shows no direct

472 correlation with ORR activity or it is not the main active sites for ORR process in  
473 catalysts.

474

475 **1.4 Reaction pathway details and other spatial configurations similar to MN2C**

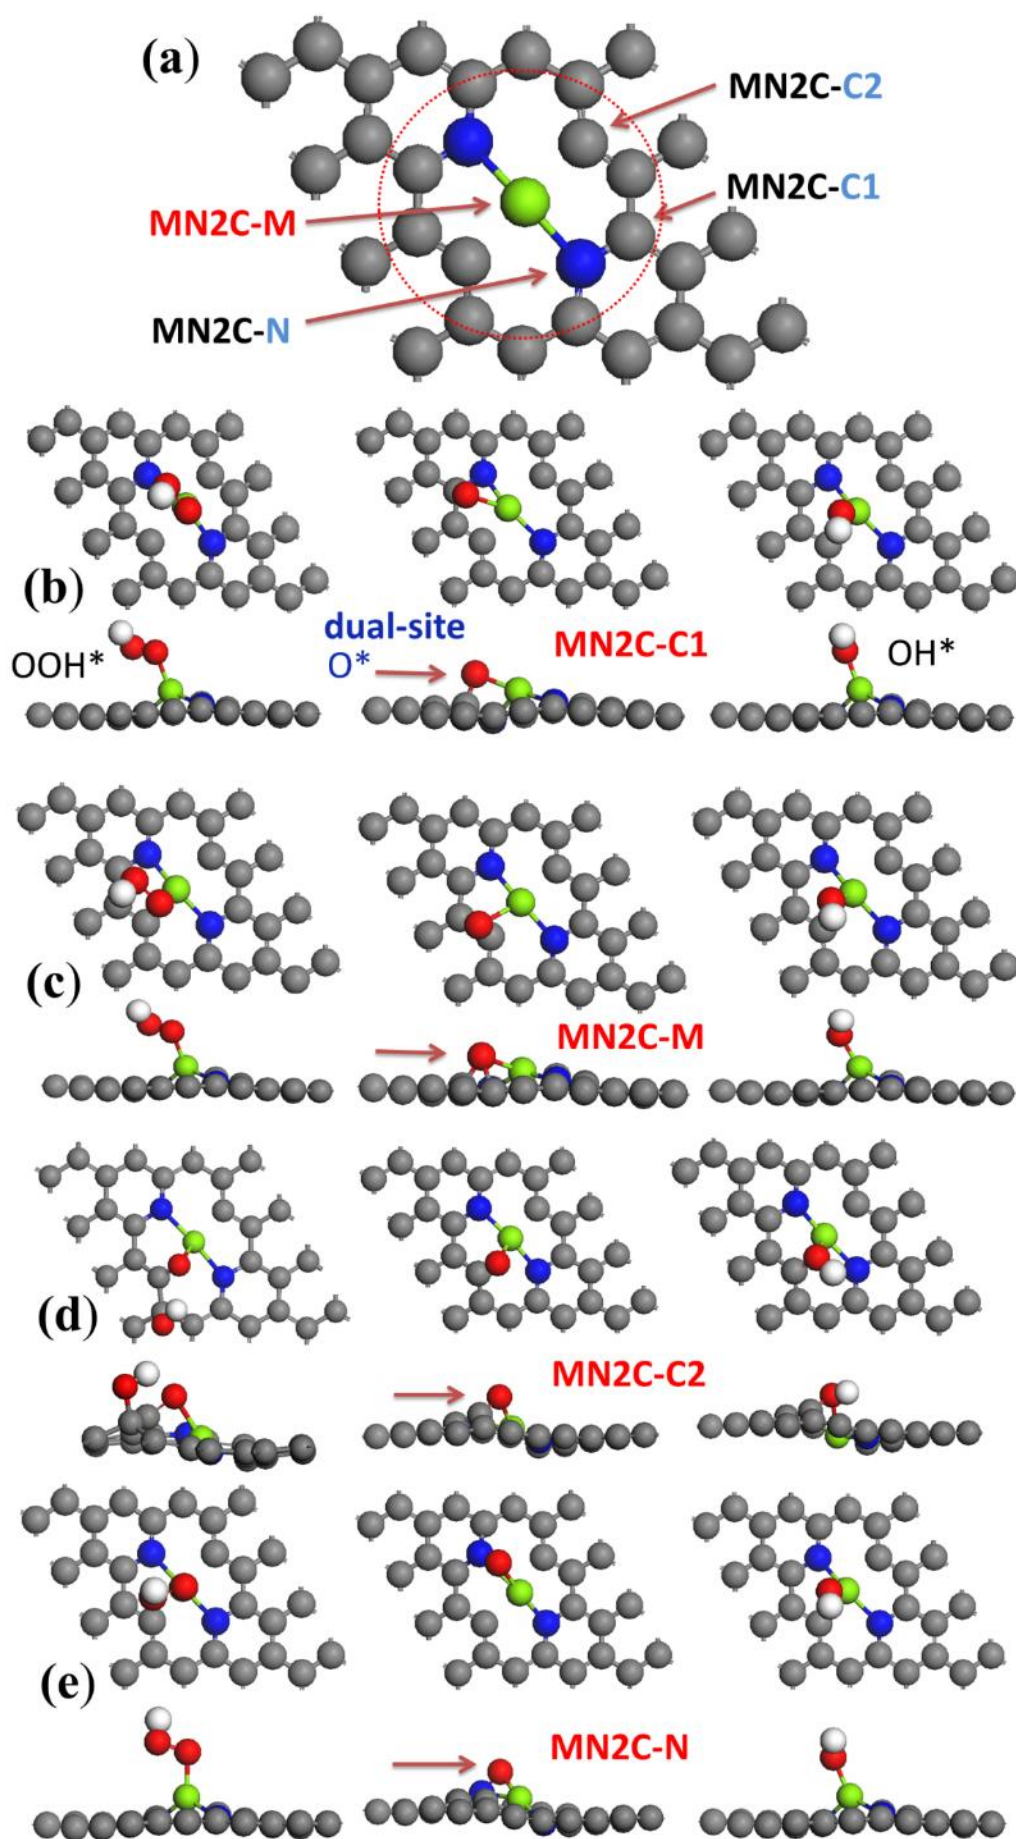

477 **Supplementary Figure 37.** Active sites identification for MN<sub>2</sub>C. (a) Possible active  
478 sites in MN<sub>2</sub>C catalyst for the ORR. And the atomistic structures of OOH\* (left panel),  
479 O\*(middle panel) and OH\* (right panel) when (b) C1, (c) Mg, (d) C2 and (e) N atoms  
480 are set as the active site, respectively. The O\* is adsorbed at dual sites by both Mg and  
481 surrounding atoms as the red arrows pointed out. It further reveals that Mg doping not  
482 only moderates the adsorption strength of oxygen species at Mg site, but also change  
483 the adsorption strength at surrounding carbon atoms.

484

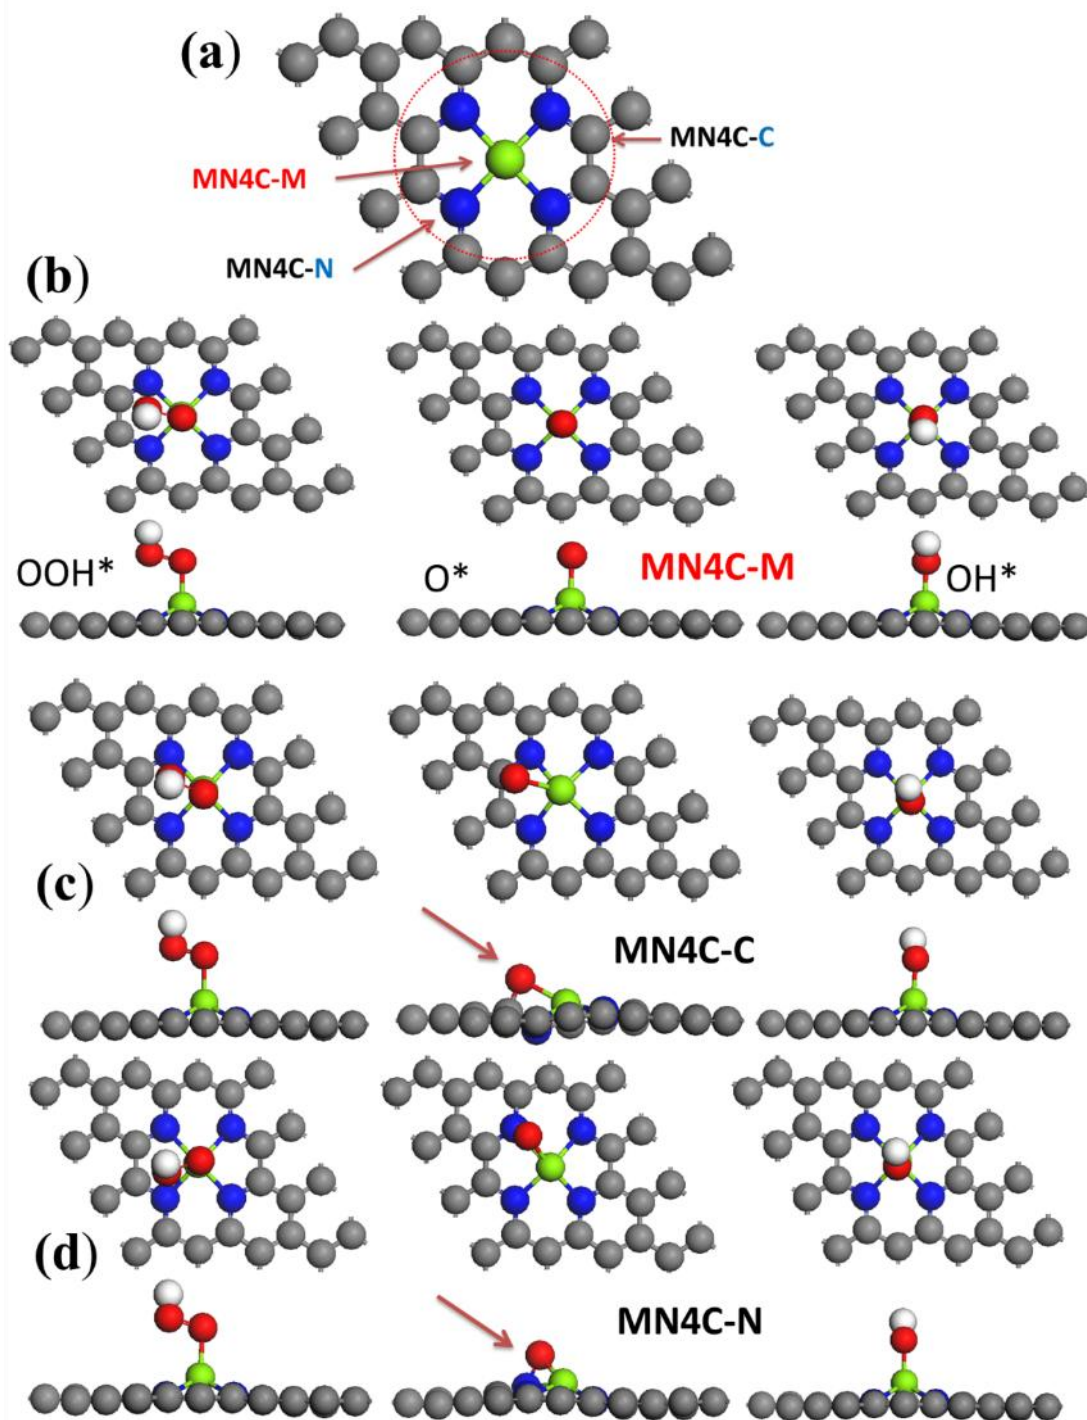

485

486 **Supplementary Figure 38.** Active sites identification for MN4C. (a) Possible active  
 487 sites in MN4C catalyst for the ORR. And the atomistic structures of OOH\* (left panel),  
 488 O\* (middle panel) and OH\* (right panel) when (b) Mg, (c) C and (d) N atoms are set as  
 489 the active site, respectively. The O\* is adsorbed at dual sites by both Mg and  
 490 surrounding atoms as the red arrows pointed out. It further reveals that Mg doping will  
 491 not only moderate the adsorption strength of oxygen species at Mg site, but also change  
 492 the adsorption strength at surrounding carbon atoms.

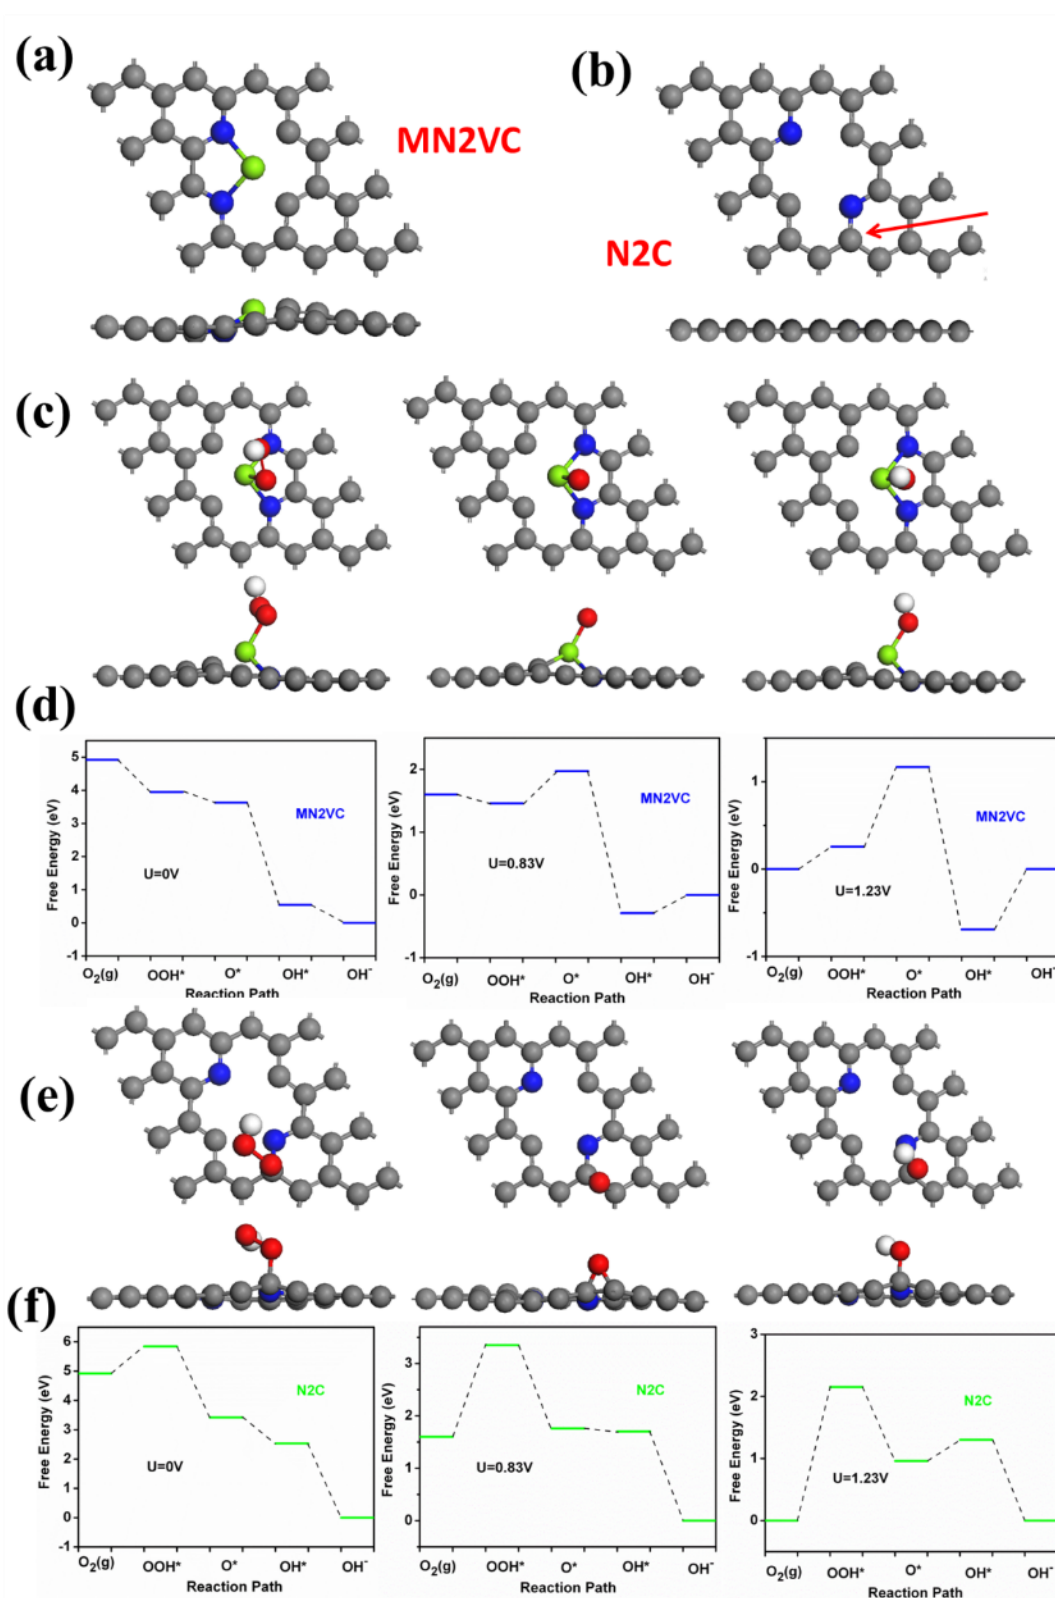

494

495 **Supplementary Figure 39.** Possible atomistic configuration for MN2C. (b) Atomistic  
 496 structure for N2C when metallic atom is in absence. (c) Atomistic structures of initial  
 497 state (left panel, state OOH\*), transition state (middle panel, state O\*), and final state

498 (right panel, state OH\*) for the reactive pathway of MN2VC and (e) for N2C. (d) ORR  
499 Free energy diagram for MN2VC and (f) for N2C.

500

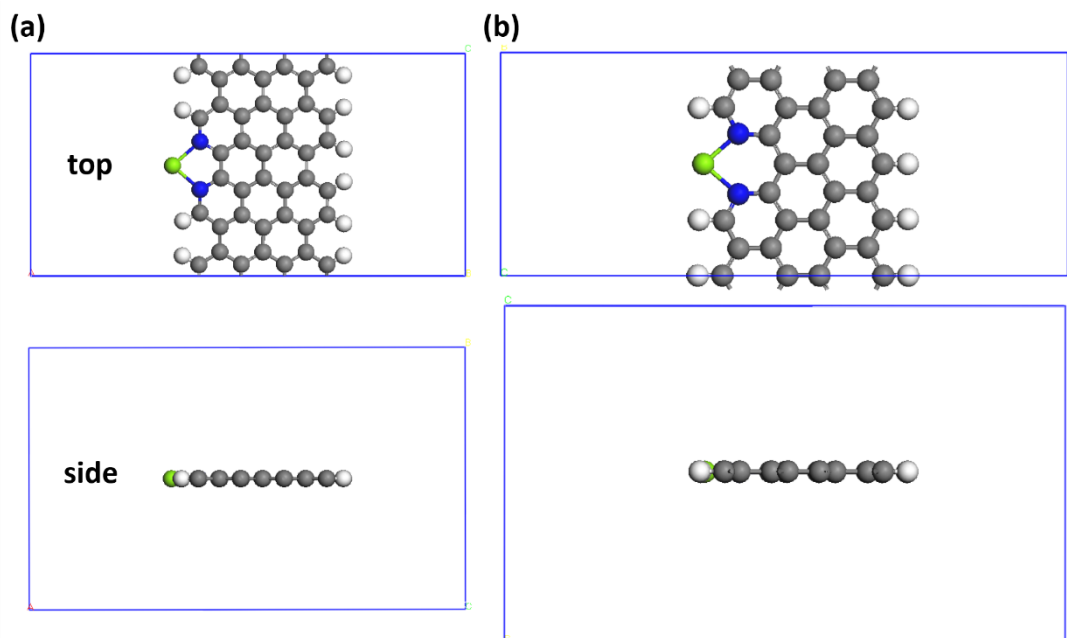

501

502 **Supplementary Figure 40.** Configurations of edge-bonded Mg cofactors. (a) The top  
503 and side views of armchair edge-bonded MgN2C cofactor. (b) The top and side views  
504 of zigzag edge-bonded MgN2C cofactor.

505



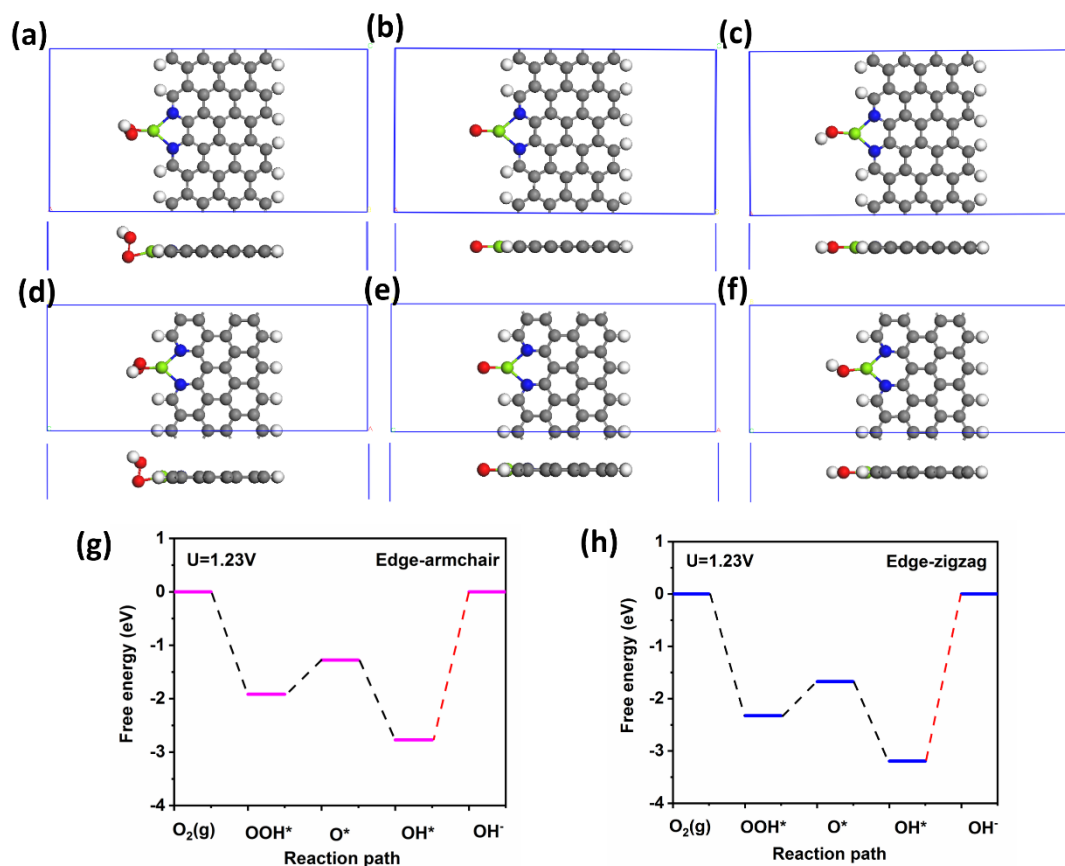

506

507 **Supplementary Figure 41.** The configurations of intermediates on edge-bonded Mg  
 508 cofactors and corresponding free energy diagrams. (a-c) The top and side views of  
 509 OOH\*, O\*, OH\* at armchair edge-bonded MgN2C cofactor. (d-f) The top and side  
 510 views of OOH\*, O\*, OH\* at zigzag edge-bonded MgN2C cofactor. (g and h) The free  
 511 energy diagrams of armchair edge-bonded MgN2C and zigzag edge bonded MgN2C.

512

513 From the result of XANES and other characterizations, the Mg center coordinated  
 514 with two nitrogen atoms is the most likely active cofactor combined with DFT results,  
 515 so we also calculate the other possible configuration of MN2VC, but it shows poor  
 516 activity than MN2C, so MN2C is the most possible active structure for ORR. To further  
 517 confirm the Mg contribution, the structure with Mg absence is also calculated, as shown  
 518 in Fig. f, it shows much poor activity with so large energy barriers at oxygen activation  
 519 step ( $O_2$  transforms to OOH), thus lower onset potential (Table S4). These results  
 520 confirm the importance of Mg center and the catalytic role in Mg cofactors for ORR.

521 To evaluate the activity contribution of the edge-bonded MgN2C cofactors, we  
 522 also calculated the free energy on the armchair edge and zigzag edge Mg cofactors as  
 523 shown in Supplementary Figure 40. The intermediates adsorbed on the two typical edge

524 cofactors are shown in Supplementary Figure 41, and the adsorption strength of OH\*  
525 at the two cofactors are too strong to catalyze the ORR.

526

## 527 2. Supplementary Tables

528

529 **Supplementary Table 1.** Reaction free energies of elementary steps and predicted  
530 adsorption energies of various ORR species for reference at zero potential.

531

| Step energy<br>barrier (eV) | $\Delta G_1$ | $\Delta G_2$ | $\Delta G_3$ | $\Delta G_4$ |
|-----------------------------|--------------|--------------|--------------|--------------|
| Pt                          | -0.84        | -1.60        | -1.72        | -0.77        |
| Ideal model                 | -1.23        | -1.23        | -1.23        | -1.23        |

532

| Adsorbates energy<br>(eV) | $\Delta G_{O^*}$ | $\Delta G_{OH^*}$ | $\Delta G_{OOH^*}$ |
|---------------------------|------------------|-------------------|--------------------|
| Pt                        | -2.34            | -0.84             | -3.9               |
| Ideal model               | -2.46            | -1.23             | -3.69              |

533

534 **Supplementary Table 2.** Reaction free energies of elementary steps for MN<sub>x</sub>C, AN<sub>x</sub>C  
535 and CN<sub>x</sub>C at zero potential, where the metallic center is set as the active sites and the  
536 reaction free energies on possible active sites of the MN<sub>2</sub>C and MN<sub>4</sub>C catalysts.

537

| Step energy<br>barrier for Mg<br>center (eV) | $\Delta G_1$ | $\Delta G_2$ | $\Delta G_3$ | $\Delta G_4$ |
|----------------------------------------------|--------------|--------------|--------------|--------------|
| MN <sub>4</sub> C                            | -1.09        | -0.41        | -2.97        | -0.45        |
| MN <sub>2</sub> C                            | -0.84        | -1.60        | -1.72        | -0.77        |
| MN <sub>3</sub> C                            | -5.94        | -0.48        | -2.87        | 4.37         |
| MN <sub>1</sub> C                            | -6.85        | -0.46        | -2.90        | -5.28        |

538

| Step energy<br>barrier for Al<br>center (eV) | $\Delta G_1$ | $\Delta G_2$ | $\Delta G_3$ | $\Delta G_4$ |
|----------------------------------------------|--------------|--------------|--------------|--------------|
| AN4C                                         | -2.51        | -0.97        | -2.69        | -1.25        |
| AN2C                                         | -1.53        | -0.97        | -2.64        | 0.22         |
| AN3C                                         | -5.60        | -1.83        | -1.79        | -4.29        |
| AN1C                                         | -4.24        | -1.19        | -2.65        | -3.15        |

539

| Step energy<br>barrier for Ca<br>center (eV) | $\Delta G_1$ | $\Delta G_2$ | $\Delta G_3$ | $\Delta G_4$ |
|----------------------------------------------|--------------|--------------|--------------|--------------|
| CN4C                                         | -1.49        | -0.32        | -2.95        | -0.16        |
| CN2C                                         | -1.36        | -0.32        | -2.88        | -0.37        |
| CN3C                                         | -11.55       | -0.25        | -3.00        | 9.89         |
| CN1C                                         | -11.52       | 0.68         | -3.92        | 9.85         |

540

| Step energy<br>barrier (eV) | $\Delta G_1$ | $\Delta G_2$ | $\Delta G_3$ | $\Delta G_4$ |
|-----------------------------|--------------|--------------|--------------|--------------|
| MN2C                        | -0.84        | -1.60        | -1.72        | -0.77        |
| MN2VC                       | -0.97        | -0.32        | -3.09        | -0.54        |
| N2C                         | 0.92         | -2.42        | -0.89        | -2.53        |

541

| Step energy<br>barrier (eV) | $\Delta G_1$ | $\Delta G_2$ | $\Delta G_3$ | $\Delta G_4$ |
|-----------------------------|--------------|--------------|--------------|--------------|
| MN2C-M                      | -0.84        | -1.60        | -1.72        | -0.77        |
| MN2C-C1                     | -0.82        | -0.96        | -2.31        | -0.84        |
| MN2C-C2                     | -3.25        | -2.10        | 0.45         | -0.02        |

MN2C-N                    -0.70                    -1.37                    -2.00                    -0.85

542

| Step energy barrier (eV) | $\Delta G_1$ | $\Delta G_2$ | $\Delta G_3$ | $\Delta G_4$ |
|--------------------------|--------------|--------------|--------------|--------------|
| MN4C-M                   | -1.09        | -0.41        | -2.97        | -0.45        |
| MN4C-C                   | -1.09        | -1.26        | -2.12        | -0.45        |
| MN4C-N                   | -1.09        | -0.84        | -2.54        | -0.45        |

543

544 **Supplementary Table 3.** Predicted adsorption energies of various ORR species for  
 545 MN<sub>x</sub>C, AN<sub>x</sub>C and CN<sub>x</sub>C at zero potential, where the metallic center is set as the active  
 546 sites and the predicted adsorption energies on possible active sites of the MN2C and  
 547 MN4C catalysts

548

| Adsorbates energy for Mg center (eV) | $\Delta G_{O^*}$ | $\Delta G_{OH^*}$ | $\Delta G_{OOH^*}$ |
|--------------------------------------|------------------|-------------------|--------------------|
| MN4C                                 | 3.42             | 0.45              | 3.83               |
| MN2C                                 | 2.48             | 0.77              | 4.08               |
| MN3C                                 | -1.50            | -4.37             | -1.02              |
| MN1C                                 | -2.39            | -5.28             | -1.93              |

549

| Adsorbates energy for Al center (eV) | $\Delta G_{O^*}$ | $\Delta G_{OH^*}$ | $\Delta G_{OOH^*}$ |
|--------------------------------------|------------------|-------------------|--------------------|
| AN4C                                 | 1.44             | -1.25             | 2.41               |
| AN2C                                 | 2.42             | -0.22             | 3.39               |
| AN3C                                 | -2.51            | -4.29             | -0.68              |
| AN1C                                 | -0.51            | -3.15             | 0.68               |

550

| Adsorbates energy for Ca center (eV) | $\Delta G_{O^*}$ | $\Delta G_{OH^*}$ | $\Delta G_{OOH^*}$ |
|--------------------------------------|------------------|-------------------|--------------------|
|--------------------------------------|------------------|-------------------|--------------------|

|      |       |       |       |
|------|-------|-------|-------|
| CN4C | 3.12  | 0.16  | 3.43  |
| CN2C | 3.24  | 0.37  | 3.56  |
| CN3C | -6.88 | -9.89 | -6.63 |
| CN1C | -5.93 | -9.85 | -6.60 |

551

| Adsorbates energy<br>(eV) | $\Delta G_{O^*}$ | $\Delta G_{OH^*}$ | $\Delta G_{OOH^*}$ |
|---------------------------|------------------|-------------------|--------------------|
| MN2C                      | 2.48             | 0.77              | 4.08               |
| MN2VC                     | 3.63             | 0.54              | 3.95               |
| N2C                       | 3.42             | 2.53              | 5.84               |

552

| Adsorbates energy<br>(eV) | $\Delta G_{O^*}$ | $\Delta G_{OH^*}$ | $\Delta G_{OOH^*}$ |
|---------------------------|------------------|-------------------|--------------------|
| MN2C-M                    | 2.48             | 0.77              | 4.08               |
| MN2C-C1                   | 3.15             | 0.84              | 4.10               |
| MN2C-C2                   | -0.42            | 0.02              | 1.67               |
| MN2C-N                    | 2.85             | 0.85              | 4.22               |

553

| Adsorbates energy<br>(eV) | $\Delta G_{O^*}$ | $\Delta G_{OH^*}$ | $\Delta G_{OOH^*}$ |
|---------------------------|------------------|-------------------|--------------------|
| MN4C-M                    | 3.42             | 0.45              | 3.83               |
| MN4C-C                    | 2.57             | 0.45              | 3.83               |
| MN4C-N                    | 2.30             | 0.45              | 3.83               |

554

555 **Supplementary Table 4.** Calculated onset potential values for different models.

556

| models | $U_{RHE}^{onset}$ |
|--------|-------------------|
|--------|-------------------|

|      | (V vs. RHE) |
|------|-------------|
| MN1C | -5.28       |
| MN2C | <b>0.77</b> |
| MN3C | -4.37       |
| MN4C | <b>0.41</b> |
| AN1C | -3.15       |
| AN2C | -0.22       |
| AN3C | -4.29       |
| AN4C | -1.25       |
| CN1C | -9.85       |
| CN2C | <b>0.32</b> |
| CN3C | -9.89       |
| CN4C | 0.16        |

557

| models      | $U_{\text{RHE}}^{\text{onset}}$ (V) |
|-------------|-------------------------------------|
| Pt          | 0.84                                |
| Ideal model | 1.23                                |

558

| models | $U_{\text{RHE}}^{\text{onset}}$ (V) |
|--------|-------------------------------------|
| MN2C   | <b>0.77</b>                         |
| MN2VC  | 0.32                                |
| N2C    | -0.92                               |

559

| models  | $U_{\text{RHE}}^{\text{onset}}$ (V) |
|---------|-------------------------------------|
| MN2C-M  | 0.77                                |
| MN2C-C1 | <b>0.82</b>                         |

|         |       |
|---------|-------|
| MN2C-C2 | -0.45 |
| MN2C-N  | 0.70  |

560

| models | $U_{\text{RHE}}^{\text{onset}}$ (V) |
|--------|-------------------------------------|
| MN4C-M | 0.41                                |
| MN4C-C | <b>0.45</b>                         |
| MN4C-N | 0.45                                |

561

562 **Supplementary Table 5.** Theoretical onset potential for the TM-N4-C models (data  
563 obtained from the literature reported <sup>25</sup>).

564

| Models | $\Delta G_{\text{OH}^*}$ (eV) | $U_{\text{RHE}}^{\text{onset}}$ (V) |
|--------|-------------------------------|-------------------------------------|
| Fe     | 0.81                          | <b>0.81</b>                         |
| Co     | 1.14                          | <b>0.73</b>                         |
| Ni     | 1.56                          | 0.63                                |
| Cu     | 1.71                          | 0.66                                |
| Zn     | 2.06                          | -0.10                               |
| Cr     | 0.03                          | 0.03                                |
| Mn     | 0.15                          | 0.25                                |
| Cd     | 1.89                          | -0.07                               |
| Ru     | 1.47                          | 0.34                                |
| Rh     | 1.34                          | 0.46                                |
| Pd     | 2.54                          | -0.41                               |
| Ag     | 1.60                          | 0.48                                |

565

566 **Supplementary Table 6.** Adsorbate strength and the p-electrons feature.

567 (A) The outer shell p-electrons integrated for all models at metal sites

| models | Spin-up (state) | Spin-down (state) |
|--------|-----------------|-------------------|
| MN2C   | 0.098           | 0.098             |
| MN4C   | 0.116           | 0.116             |
| MN3C   | 0.175           | 0.175             |
| MN1C   | 1.37            | 1.48              |

568

569 (B) The Adsorption free energies of OH as a function of the  $\epsilon_p$  position of metal centers  
570 for Mg, Al and Ca cofactors.

571

| Models | P band center position (eV) | $\Delta G_{OH^*}$ (eV) |
|--------|-----------------------------|------------------------|
| MN2C   | 5.99                        | 0.77                   |
| MN4C   | 4.65                        | 0.45                   |
| MN3C   | 2.25                        | -4.37                  |
| AN2C   | 5.75                        | -0.22                  |
| AN4C   | 2.50                        | -1.25                  |
| AN3C   | 0.51                        | -4.29                  |
| CN2C   | -4.87                       | 0.40                   |
| CN4C   | -4.33                       | 0.16                   |
| CN3C   | -12.16                      | -9.89                  |

572

573 (C) The Bader charge analysis and electrons donation from OH radical to MN<sub>x</sub>C.

| Charge value ( $e^-$ ) | MN2C          | MN4C          | MN3C          |
|------------------------|---------------|---------------|---------------|
| Mg                     | 0.3741        | 0.3589        | 0.3626        |
| <b>O</b>               | <b>7.3715</b> | <b>7.4055</b> | <b>7.4414</b> |
| H                      | 0.4037        | 0.4097        | 0.3933        |



|                           |               |               |               |
|---------------------------|---------------|---------------|---------------|
| OH                        | 7.7752        | 7.8152        | 7.8347        |
| <b>electrons donation</b> | <b>0.2248</b> | <b>0.1848</b> | <b>0.1653</b> |

574

575 (D) The Adsorption free energies of OH as a function of highest O occupied state of  
576 hydroxyl after interaction with Mg, Al and Ca cofactors.

577

| Models  | O 2p highest occupied level after interaction (eV) | $\Delta G_{OH^*}$ (eV) |
|---------|----------------------------------------------------|------------------------|
| MN2C-OH | -0.16                                              | 0.77                   |
| MN4C-OH | -0.45                                              | 0.45                   |
| MN3C-OH | -0.8                                               | -4.37                  |
| AN2C-OH | -1                                                 | -0.22                  |
| AN4C-OH | -2                                                 | -1.25                  |
| AN3C-OH | -4                                                 | -4.29                  |
| CN2C-OH | -0.15                                              | 0.37                   |
| CN4C-OH | -0.5                                               | 0.16                   |
| CN3C-OH | -4.2                                               | -9.89                  |

578

579 **Supplementary Table 7.** The crystal data for Mg-HMT.

580 Lattice parameters:

| <b>a</b>       | <b>b</b> | <b>c</b> | <b>alpha</b> | <b>beta</b> | <b>gamma</b> |
|----------------|----------|----------|--------------|-------------|--------------|
| <b>9.50800</b> | 9.42800  | 9.30900  | 78.8600      | 105.0800    | 120.1300     |

581

582 Unit-cell volume = 694.910380 Å<sup>3</sup>

583

584 **Supplementary Table 8.** Elements contents of Mg-N-C from ICP-AES analysis.

585

| Elements (wt%) | Mg   | Fe    | Co    | Ni    |
|----------------|------|-------|-------|-------|
| Mg-N-C         | 1.30 | 0.018 | 0.001 | 0.001 |

586

587 **Supplementary Table 9.** The ORR activity comparison between Mg-N-C and other  
588 catalysts reported in 0.1 M KOH electrode and acidic solution.

589 **The alkaline ORR activity comparison between this work and reported materials**  
590 **in recent years.**

| Reported time | Co-based electrocatalysts               | Half-wave potential (V vs. RHE) | References       |
|---------------|-----------------------------------------|---------------------------------|------------------|
| 2015.10       | Co-N-C-0.8 NPHs                         | 0.871                           | 26               |
| 2016.1        | ZIF-67 derived carbon                   | 0.87                            | 27               |
| 2016.6        | CoSAs/N-C(900)                          | 0.88                            | 28               |
| 2017          | NC@Co-NGC DSNC                          | 0.82                            | 29               |
| 2017.2        | Co-C <sub>3</sub> N <sub>4</sub> /CNT   | 0.85                            | 30               |
| 2018.7        | Co <sub>3</sub> O <sub>4</sub> /HNCP-40 | 0.845                           | 31               |
| 2018.11       | N-C-CoO <sub>x</sub>                    | 0.84                            | 32               |
| 2019.9        | Co-N-C                                  | 0.91                            | 33               |
| <b>2019.9</b> | <b>Mg-N-C</b>                           | <b>0.91</b>                     | <b>This work</b> |

591

| Reported time | Fe-based electrocatalysts | Half-wave potential (V vs. RHE) | References |
|---------------|---------------------------|---------------------------------|------------|
|---------------|---------------------------|---------------------------------|------------|

|               |               |             |                  |
|---------------|---------------|-------------|------------------|
| 2017.4        | Fe-N-C        | 0.90        | 34               |
| 2018.10       | CNT/PC        | 0.88        | 35               |
| 2019          | CAN-Pc(Fe/Co) | 0.84        | 36               |
| 2019.6        | Co-Fe alloy   | 0.89        | 37               |
| 2019.9        | Fe-NCNWs      | 0.91        | 38               |
| <b>2019.9</b> | <b>Mg-N-C</b> | <b>0.91</b> | <b>This work</b> |

592

| <b>Reported time</b> | <b>Mn or Cu-based electrocatalysts</b> | <b>Half-wave potential (V vs. RHE)</b> | <b>References</b> |
|----------------------|----------------------------------------|----------------------------------------|-------------------|
| 2016.9               | Cu-N@C                                 | 0.80                                   | 39                |
| 2018.6               | Mn-N-O                                 | 0.86                                   | 40                |
| 2019.5               | Mn@NG                                  | 0.82                                   | 41                |
| 2019.8               | Cu-N-C-ICHP                            | 0.85                                   | 42                |
| 2019.8               | Cu ISAS/NC                             | 0.92                                   | 43                |
| 2019.9               | Cu/G                                   | 0.85                                   | 44                |
| <b>2019.9</b>        | <b>Mg-N-C</b>                          | <b>0.91</b>                            | <b>This work</b>  |

593

| <b>Reported time</b> | <b>Carbon-based electrocatalysts</b> | <b>Half-wave potential (V vs. RHE)</b> | <b>References</b> |
|----------------------|--------------------------------------|----------------------------------------|-------------------|
| 2016,12              | N,S co-doped carbon                  | 0.87                                   | 45                |
| 2017.1               | 1100-CNS                             | 0.85                                   | 46                |

|               |                 |             |                  |
|---------------|-----------------|-------------|------------------|
| 2017.7        | NHPC-900-1000   | 0.84        | 47               |
| 2018.2        | N-Doped Carbons | 0.69        | 48               |
| 2018.10       | NFLGDY-900c     | 0.87        | 49               |
| 2018.10       | N-HC@G-900      | 0.85        | 50               |
| 2019.9        | SNBCs           | 0.85        | 51               |
| <b>2019.9</b> | <b>Mg-N-C</b>   | <b>0.91</b> | <b>This work</b> |

594

595 The corresponding chart for alkaline ORR activity comparison.

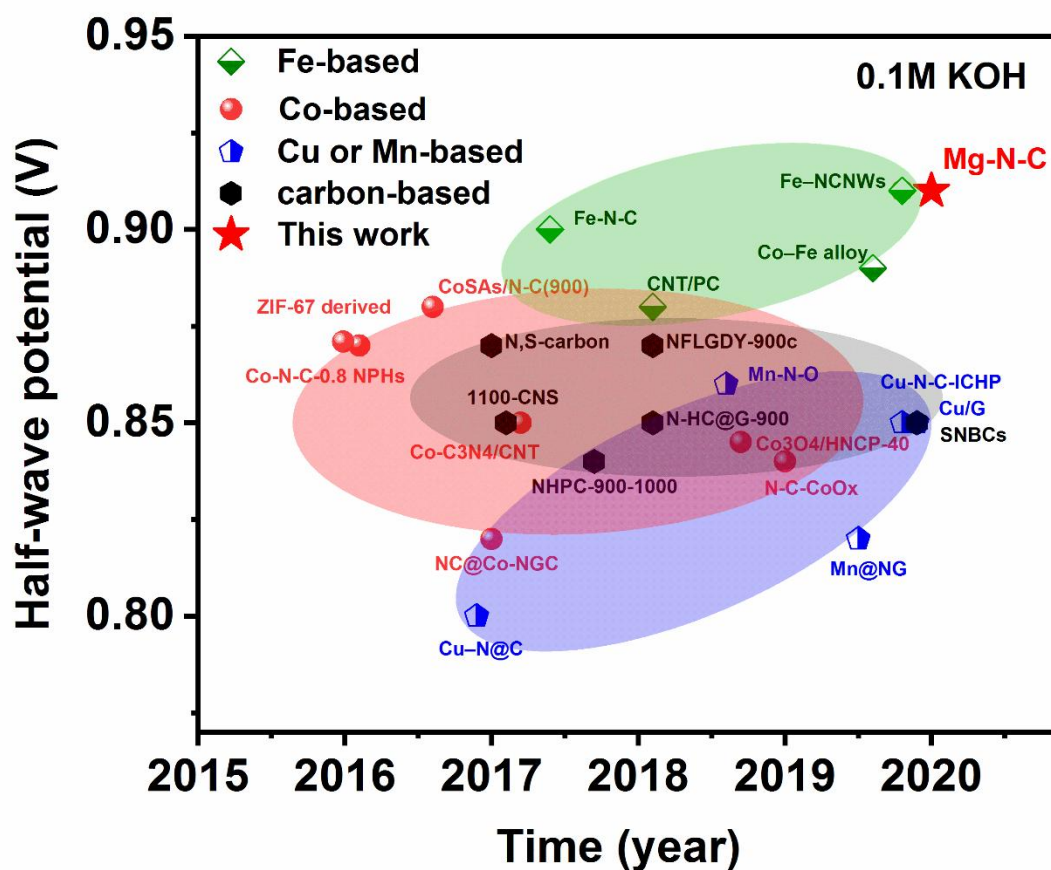

596

597

598 The acidic ORR activity comparison between this work and reported materials  
 599 in recent years.

| <b>Reported time</b> | <b>Fe-based electrocatalysts</b> | <b>Half-wave potential (V vs. RHE)</b> | <b>References</b> |
|----------------------|----------------------------------|----------------------------------------|-------------------|
| 2015.5               | Fe-N-C nanofiber                 | 0.62                                   | 52                |
| 2015.6               | Fe-N-C                           | 0.84                                   | 53                |
| 2016.7               | Fe-N-C                           | 0.82                                   | 54                |
| 2017.8               | (CM+PANI)<br>Fe-C                | 0.80                                   | 55                |
| 2017.11              | Fe SAs/N-C                       | 0.75                                   | 56                |
| 2018.10              | CNT/PC                           | 0.79                                   | 35                |
| 2018.12              | PF-2                             | 0.771                                  | 57                |
| 2019.6               | Fe-N-C                           | 0.88                                   | 58                |
| 2019.9               | Fe-NCNWs                         | 0.82                                   | 38                |
| <b>2019.9</b>        | <b>Mg-N-C</b>                    | <b>0.79</b>                            | <b>This work</b>  |

600

| <b>Reported time</b> | <b>Co, Mn or Cr-based electrocatalysts</b> | <b>Half-wave potential (V vs. RHE)</b> | <b>References</b> |
|----------------------|--------------------------------------------|----------------------------------------|-------------------|
| 2015.10              | Co-N-C-0.8 NPHs                            | 0.761                                  | 26                |
| 2017.11              | Co SAs/N-C                                 | 0.747                                  | 56                |
| 2018.10              | Mn-N-C-second                              | 0.80                                   | 59                |
| 2018.10              | Mn-N-C                                     | 0.78                                   | 60                |
| 2019.7               | Cr-N-C                                     | 0.774                                  | 61                |
| <b>2019.9</b>        | <b>Mg-N-C</b>                              | <b>0.79</b>                            | <b>This work</b>  |

601

| Reported time | Carbon-based electrocatalysts | Half-wave potential (V vs. RHE) | References       |
|---------------|-------------------------------|---------------------------------|------------------|
| 2015.10       | N, P-doped porous carbon      | 0.62                            | 62               |
| 2016.4        | N, P-doped CGHNs              | 0.68                            | 63               |
| 2017.1        | 1100-CNS                      | 0.73                            | 46               |
| 2018.10       | N-HC@G-900                    | 0.65                            | 50               |
| <b>2019.9</b> | <b>Mg-N-C</b>                 | <b>0.79</b>                     | <b>This work</b> |

602

603 The corresponding chart for alkaline ORR activity comparison.

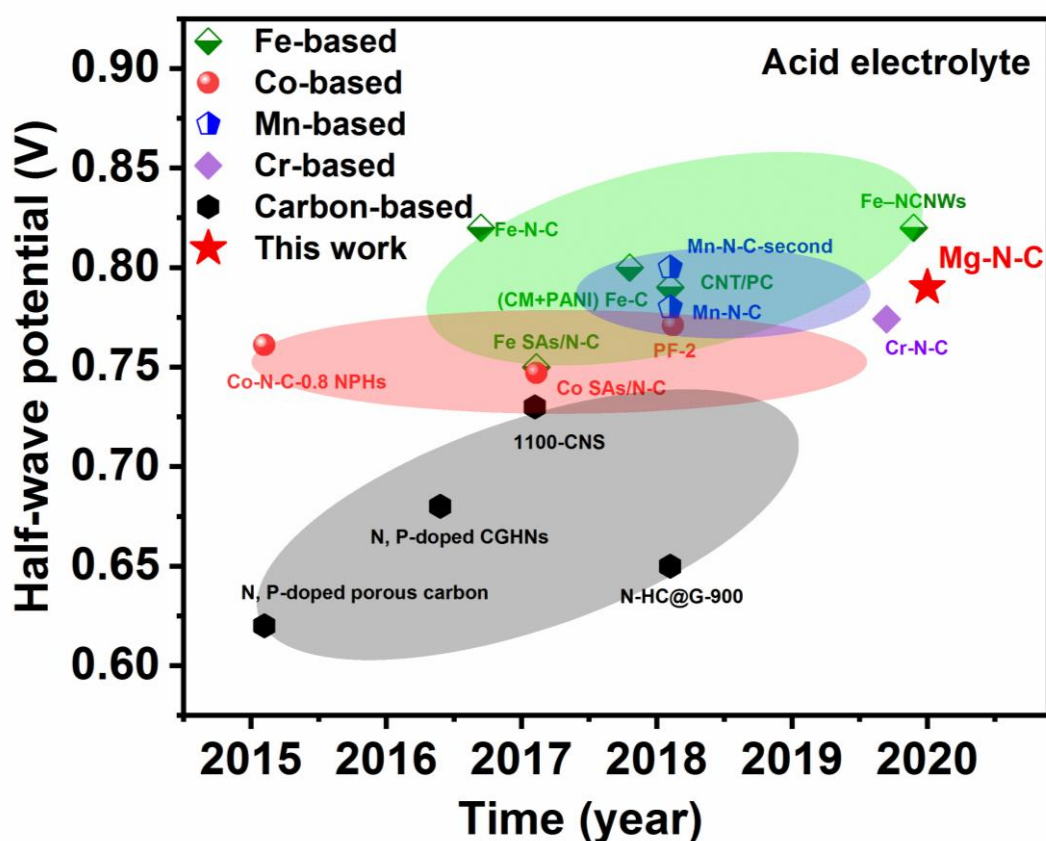

604

605

606

607 **Supplementary Table 10.** Elements contents of post-doped N-C-X from XPS analysis.

608

| Elements (wt%) | C     | N     | Mg   | Fe |
|----------------|-------|-------|------|----|
| N-C-pristine   | 84.78 | 15.22 | 0    | 0  |
| N-C-0Mg        | 88.99 | 11.01 | 0    | 0  |
| N-C-1Mg        | 88.18 | 11.35 | 0.48 | 0  |
| N-C-3Mg        | 88.85 | 11.54 | 0.62 | 0  |

609

610

611 **Supplementary Table 11.** The entropy and zero-point energy corrections values used  
612 for the calculation for the structure similarity and the values for the different metal  
613 atoms are rather close.

614

| species | T × S (eV) (298K) | ZPE (eV) |
|---------|-------------------|----------|
| H2      | 0.40              | 0.27     |
| H2O     | 0.67              | 0.56     |
| O*      | 0                 | 0.05     |
| OOH*    | 0                 | 0.35     |
| OH*     | 0.01              | 0.31     |

615

### 616 3. Supplementary References

617

- 618 1. Zheng, F., Yang, Y. & Chen, Q. High lithium anodic performance of highly  
619 nitrogen-doped porous carbon prepared from a metal-organic framework. *Nature*  
620 *Communications* **5**, 5261 (2014).
- 621 2. Ferrari, A. C. & Basko, D. M. Raman spectroscopy as a versatile tool for studying  
622 the properties of graphene. *Nature nanotechnology* **8**, 235 (2013).

- 623 3. Ingason, A. S., Eriksson, A. K., Lewin, E., Jensen, J. & Olafsson, S. Growth and  
624 structural properties of Mg:C thin films prepared by magnetron sputtering. *Thin*  
625 *Solid Films* **518**, 4225–4230 (2010).
- 626 4. Ramachandran, M. & Reddy, R. G. Direct reduction of magnesium oxide to  
627 magnesium using thermal plasma technology. *Mining, Metallurgy & Exploration*  
628 **32**, 30–37 (2015).
- 629 5. Petnikota, S. *et al.* Electrochemistry-related aspects of safety of graphene-based  
630 non-aqueous electrochemical supercapacitors: a case study with MgO-decorated  
631 few-layer graphene as an electrode material. *New J. Chem.* **43**, 9793–9801 (2019).
- 632 6. Yang, Y., Zheng, F., Xia, G., Lun, Z. & Chen, Q. Experimental and theoretical  
633 investigations of nitro-group doped porous carbon as a high performance lithium-  
634 ion battery anode. *Journal of Materials Chemistry A* **3**, 18657–18666 (2015).
- 635 7. Huang, H.-H., Shih, W.-C. & Lai, C.-H. Nonpolar resistive switching in the  
636 Pt/MgO/Pt nonvolatile memory device. *Applied Physics Letters* **96**, 193505  
637 (2010).
- 638 8. Le Febvrier, A., Jensen, J. & Eklund, P. Wet-cleaning of MgO (001):  
639 Modification of surface chemistry and effects on thin film growth investigated by  
640 x-ray photoelectron spectroscopy and time-of-flight secondary ion mass  
641 spectroscopy. *Journal of Vacuum Science & Technology A: Vacuum, Surfaces,*  
642 *and Films* **35**, 021407 (2017).



- 643 9. Zhang, H. *et al.* Single atomic iron catalysts for oxygen reduction in acidic media:  
644 particle size control and thermal activation. *Journal of the American Chemical*  
645 *Society* **139**, 14143–14149 (2017).
- 646 10. Jansson, S., Brabie, V. & Jönsson, P. Corrosion Mechanism of Commercial  
647 MgO–C Refractories in Contact with Different Gas Atmospheres. *ISIJ Int.* **48**,  
648 760–767 (2008).
- 649 11. Fruehan, R. J. & Martonik, L. J. The Rate of reduction of MgO by carbon. *MTB* **7**,  
650 537–542 (1976).
- 651 12. Li, J. *et al.* Thermally Driven Structure and Performance Evolution of Atomically  
652 Dispersed FeN<sub>4</sub> Sites for Oxygen Reduction. *Angewandte Chemie International*  
653 *Edition n/a*, (2019).
- 654 13. Liu, Q., Liu, X., Zheng, L. & Shui, J. The Solid-Phase Synthesis of an Fe-N-C  
655 Electrocatalyst for High-Power Proton-Exchange Membrane Fuel Cells. *Angew.*  
656 *Chem. Int. Ed.* **57**, 1204–1208 (2018).
- 657 14. Yang, W. *et al.* Facile Synthesis of Fe/N/S-Doped Carbon Tubes as High-  
658 Performance Cathode and Anode for Microbial Fuel Cells. *ChemCatChem n/a*,  
659 (2019).
- 660 15. Li, Z. Q., Lu, C. J., Xia, Z. P., Zhou, Y. & Luo, Z. X-ray diffraction patterns of  
661 graphite and turbostratic carbon. *Carbon* **45**, 1686–1695 (2007).
- 662 16. Choudhury, B. & Choudhury, A. Microstructural, optical and magnetic properties  
663 study of nanocrystalline MgO. *Materials Research Express* **1**, 025026 (2014).

- 664 17. Wu, G., More, K. L., Johnston, C. M. & Zelenay, P. High-Performance  
665 Electrocatalysts for Oxygen Reduction Derived from Polyaniline, Iron, and  
666 Cobalt. *Science* **332**, 443–447 (2011).
- 667 18. Li, Z. *et al.* Ionic Liquids as Precursors for Efficient Mesoporous Iron -  
668 Nitrogen - Doped Oxygen Reduction Electrocatalysts. *Angewandte Chemie*  
669 *International Edition* **54**, 1494–1498 (2015).
- 670 19. Wang, Q. *et al.* Phenylenediamine-based FeN<sub>x</sub>/C catalyst with high activity for  
671 oxygen reduction in acid medium and its active-site probing. *Journal of the*  
672 *American chemical Society* **136**, 10882–10885 (2014).
- 673 20. Oh, I., Biggin, M. E. & Gewirth, A. A. Poisoning the active site of  
674 electrochemical reduction of dioxygen on metal monolayer modified electrode  
675 surfaces. *Langmuir* **16**, 1397–1406 (2000).
- 676 21. Cheng, Y., Zhang, J. & Jiang, S. P. Are metal-free pristine carbon nanotubes  
677 electrocatalytically active? *Chemical Communications* **51**, 13764–13767 (2015).
- 678 22. Thorum, M. S., Hankett, J. M. & Gewirth, A. A. Poisoning the oxygen reduction  
679 reaction on carbon-supported Fe and Cu electrocatalysts: evidence for metal-  
680 centered activity. *The Journal of Physical Chemistry Letters* **2**, 295–298 (2011).
- 681 23. Guo, D. *et al.* Active sites of nitrogen-doped carbon materials for oxygen  
682 reduction reaction clarified using model catalysts. *Science* **351**, 361–365 (2016).
- 683 24. Jia, Y. *et al.* Identification of active sites for acidic oxygen reduction on carbon  
684 catalysts with and without nitrogen doping. *Nature Catalysis* **2**, 688–695 (2019).

- 685 25. Xu, H., Cheng, D., Cao, D. & Zeng, X. C. A universal principle for a rational  
686 design of single-atom electrocatalysts. *Nature Catalysis* **1**, 339–348 (2018).
- 687 26. You, B. *et al.* Bimetal–organic framework self-adjusted synthesis of support-free  
688 nonprecious electrocatalysts for efficient oxygen reduction. *Acs Catalysis* **5**,  
689 7068–7076 (2015).
- 690 27. Xia, B. Y. *et al.* A metal–organic framework-derived bifunctional oxygen  
691 electrocatalyst. *Nat Energy* **1**, 1–8 (2016).
- 692 28. Yin, P. *et al.* Single Cobalt Atoms with Precise N-Coordination as Superior  
693 Oxygen Reduction Reaction Catalysts. *Angewandte Chemie International Edition*  
694 **55**, 10800–10805 (2016).
- 695 29. Liu, S. *et al.* Metal-Organic-Framework-Derived Hybrid Carbon Nanocages as a  
696 Bifunctional Electrocatalyst for Oxygen Reduction and Evolution. *Adv. Mater.*  
697 **29**, 1700874 (2017).
- 698 30. Zheng, Y. *et al.* Molecule-level g-C<sub>3</sub>N<sub>4</sub> coordinated transition metals as a new  
699 class of electrocatalysts for oxygen electrode reactions. *Journal of the American*  
700 *Chemical Society* **139**, 3336–3339 (2017).
- 701 31. Ding, D. *et al.* Multi-Level Architecture Optimization of MOF-Templated Co-  
702 Based Nanoparticles Embedded in Hollow N-Doped Carbon Polyhedra for  
703 Efficient OER and ORR. *ACS Catal.* **8**, 7879–7888 (2018).

- 704 32. Peng, X. *et al.* Nitrogen - doped Carbon–CoOx Nanohybrids: A Precious Metal  
705 Free Cathode that Exceeds 1.0 W cm<sup>-2</sup> Peak Power and 100 h Life in Anion -  
706 Exchange Membrane Fuel Cells. *Angewandte Chemie* **131**, 1058–1063 (2019).
- 707 33. Zhu, Y. *et al.* Engineering Local Coordination Environments of Atomically  
708 Dispersed and Heteroatom - Coordinated Single Metal Site Electrocatalysts for  
709 Clean Energy - Conversion. *Adv. Energy Mater.* 1902844 (2019)  
710 doi:10.1002/aenm.201902844.
- 711 34. Chen, Y. *et al.* Isolated single iron atoms anchored on N - doped porous carbon as  
712 an efficient electrocatalyst for the oxygen reduction reaction. *Angewandte Chemie*  
713 *International Edition* **56**, 6937–6941 (2017).
- 714 35. Sa, Y. J. *et al.* A General Approach to Preferential Formation of Active Fe–Nx  
715 Sites in Fe–N/C Electrocatalysts for Efficient Oxygen Reduction Reaction. *J. Am.*  
716 *Chem. Soc.* **138**, 15046–15056 (2016).
- 717 36. Yang, S. *et al.* Two - dimensional conjugated aromatic networks as high - site -  
718 density and single - atom electrocatalysts towards oxygen reduction reaction.  
719 *Angewandte Chemie International Edition* (2019) doi:10.1002/anie.201908023.
- 720 37. Xiong, Y., Yang, Y., DiSalvo, F. J. & Abruña, H. D. Metal–Organic-Framework-  
721 Derived Co–Fe Bimetallic Oxygen Reduction Electrocatalysts for Alkaline Fuel  
722 Cells. *J. Am. Chem. Soc.* **141**, 10744–10750 (2019).

- 723 38. Li, J.-C. *et al.* Secondary-Atom-Assisted Synthesis of Single Iron Atoms  
724 Anchored on N-Doped Carbon Nanowires for Oxygen Reduction Reaction. *ACS*  
725 *Catal.* **9**, 5929–5934 (2019).
- 726 39. Wu, H. *et al.* Highly doped and exposed Cu(I)–N active sites within graphene  
727 towards efficient oxygen reduction for zinc–air batteries. *Energy Environ. Sci.* **9**,  
728 3736–3745 (2016).
- 729 40. Yang, Y. *et al.* O - , N - Atoms - Coordinated Mn Cofactors within a Graphene  
730 Framework as Bioinspired Oxygen Reduction Reaction Electrocatalysts.  
731 *Advanced Materials* **30**, (2018).
- 732 41. Bai, L., Duan, Z., Wen, X., Si, R. & Guan, J. Atomically dispersed manganese-  
733 based catalysts for efficient catalysis of oxygen reduction reaction. *Applied*  
734 *Catalysis B: Environmental* **257**, 117930 (2019).
- 735 42. Wang, T. *et al.* Cu, N - Codoped Carbon Nanodisks with Biomimic Stomata -  
736 Like Interconnected Hierarchical Porous Topology as Efficient Electrocatalyst for  
737 Oxygen Reduction Reaction. *Small* (2019).
- 738 43. Yang, Z. *et al.* Directly transforming copper (I) oxide bulk into isolated single-  
739 atom copper sites catalyst through gas-transport approach. *Nat Commun* **10**, 3734  
740 (2019).
- 741 44. Han, G. *et al.* High loading single-atom Cu dispersed on graphene for efficient  
742 oxygen reduction reaction. *Nano Energy* **66**, 104088 (2019).

- 743 45. Hu, C. & Dai, L. Multifunctional Carbon-Based Metal-Free Electrocatalysts for  
744 Simultaneous Oxygen Reduction, Oxygen Evolution, and Hydrogen Evolution.  
745 *Advanced Materials* **29**, 1604942 (2017).
- 746 46. Pei, Z. *et al.* Texturing in situ: N,S-enriched hierarchically porous carbon as a  
747 highly active reversible oxygen electrocatalyst. *Energy Environ. Sci.* **10**, 742–749  
748 (2017).
- 749 47. Wu, M. *et al.* A Facile Activation Strategy for an MOF-Derived Metal-Free  
750 Oxygen Reduction Reaction Catalyst: Direct Access to Optimized Pore Structure  
751 and Nitrogen Species. *ACS Catal.* **7**, 6082–6088 (2017).
- 752 48. Qiao, M. *et al.* Low-Cost Chitosan-Derived N-Doped Carbons Boost  
753 Electrocatalytic Activity of Multiwall Carbon Nanotubes. *Advanced Functional*  
754 *Materials* **28**, 1707284 (2018).
- 755 49. Zhao, Y. *et al.* Few-layer graphdiyne doped with sp-hybridized nitrogen atoms at  
756 acetylenic sites for oxygen reduction electrocatalysis. *Nature Chem* **10**, 924–931  
757 (2018).
- 758 50. Sun, J. *et al.* Ultrathin Nitrogen-Doped Holey Carbon@Graphene Bifunctional  
759 Electrocatalyst for Oxygen Reduction and Evolution Reactions in Alkaline and  
760 Acidic Media. *Angewandte Chemie* **130**, 16749–16753 (2018).
- 761 51. Kim, M.-J. *et al.* Biomass-Derived Air Cathode Materials: Pore-Controlled S,N-  
762 Co-doped Carbon for Fuel Cells and Metal–Air Batteries. *ACS Catal.* **9**, 3389–  
763 3398 (2019).

- 764 52. Wu, Z.-Y. *et al.* Iron Carbide Nanoparticles Encapsulated in Mesoporous Fe-N-  
765 Doped Carbon Nanofibers for Efficient Electrocatalysis. *Angewandte Chemie*  
766 *International Edition* **54**, 8179–8183 (2015).
- 767 53. Sahraie, N. R. *et al.* Quantifying the density and utilization of active sites in non-  
768 precious metal oxygen electroreduction catalysts. *Nature Communications* **6**,  
769 8618 (2015).
- 770 54. Wang, X. *et al.* Directly converting Fe-doped metal–organic frameworks into  
771 highly active and stable Fe-N-C catalysts for oxygen reduction in acid. *Nano*  
772 *Energy* **25**, 110–119 (2016).
- 773 55. Chung, H. T. *et al.* Direct atomic-level insight into the active sites of a high-  
774 performance PGM-free ORR catalyst. *Science* **357**, 479–484 (2017).
- 775 56. Wang, J. *et al.* Design of N-Coordinated Dual-Metal Sites: A Stable and Active  
776 Pt-Free Catalyst for Acidic Oxygen Reduction Reaction. *J. Am. Chem. Soc.* **139**,  
777 17281–17284 (2017).
- 778 57. Chong, L. *et al.* Ultralow-loading platinum-cobalt fuel cell catalysts derived from  
779 imidazolate frameworks. *Science* **362**, 1276–1281 (2018).
- 780 58. Zhang, H. *et al.* High-performance fuel cell cathodes exclusively containing  
781 atomically dispersed iron active sites. *Energy Environ. Sci.* **12**, 2548–2558  
782 (2019).
- 783 59. Li, J. *et al.* Atomically dispersed manganese catalysts for oxygen reduction in  
784 proton-exchange membrane fuel cells. *Nature Catalysis* **1**, 935–945 (2018).

- 785 60. Mn- and N- doped carbon as promising catalysts for oxygen reduction reaction:  
786 Theoretical prediction and experimental validation. *Applied Catalysis B:  
787 Environmental* **243**, 195–203 (2019).
- 788 61. Luo, E. *et al.* Single-Atom Cr–N<sub>4</sub> Sites Designed for Durable Oxygen Reduction  
789 Catalysis in Acid Media. *Angewandte Chemie International Edition* **58**, 12469–  
790 12475 (2019).
- 791 62. Zhang, J., Zhao, Z., Xia, Z. & Dai, L. A metal-free bifunctional electrocatalyst for  
792 oxygen reduction and oxygen evolution reactions. *Nature Nanotech* **10**, 444–452  
793 (2015).
- 794 63. Yang, J. *et al.* A Highly Efficient Metal-Free Oxygen Reduction Electrocatalyst  
795 Assembled from Carbon Nanotubes and Graphene. *Advanced Materials* **28**,  
796 4606–4613 (2016).  
797
